# Supplementary material for: Proteomic Network Analysis of Bronchoalveolar Lavage Fluid in Ex-Smokers to Discover Implicated Protein Targets and Novel Drug Treatments for Chronic Obstructive Pulmonary Disease
Source: MDPI journal article supplement (doi:10.3390/ph15050566), 2022-05-01
Supplement: s1 [file s1]

Supplementary material.

## **Supplementary methods**

### **Inclusion/exclusion criteria<sup>1</sup>**

For the COPD group, exclusion criteria included a forced expiratory volume at 1 s (FEV<sub>1</sub>) of <35%, hypercapnia, and comorbid diseases that would render bronchoscopy unsafe. Inclusion criteria were (1) chronic bronchitis as determined by history and/or emphysema as determined by chest x-ray or computed tomography; (2) 20 pack-years of cigarette smoking but smoking cessation for at least 1 year preceding enrollment; (3) the absence of other lung disease, including asthma and bronchiectasis; (4) chest x-ray findings that were normal or compatible with COPD but no other disease detected; (5) FEV<sub>1</sub>:forced vital capacity ratio and FEV<sub>1</sub> both below the lower 95% confidence limit of normal on spirometry; (6) no atopy in the medical history; (7) <15% bronchodilator response with inhaled albuterol on spirometry; and (8) no antibiotic or steroid use for 4 weeks preceding enrollment. Inclusion criteria for the no-COPD group were the same as those for the COPD group, except for the absence of lung disease by clinical evaluation, normal chest x-ray, and normal spirometric results. Healthy nonsmokers met all inclusion criteria for the no-COPD group, except that all had <5 cumulative pack-years of smoking.

## **Supplementary tables**

**Table S1: Drugs commonly prescribed for stable COPD.** Curated drugs currently indicated for COPD ("MESH:D029424") from the Comparative Toxicogenomics Database<sup>2</sup> and manually curated to include drugs used to treat stable COPD in the United States.

|                             |
|-----------------------------|
| beclomethasone dipropionate |
| budesonide                  |
| arformoterol                |
| roflumilast                 |
| aclidinium                  |
| fluticasone propionate      |
| dexamethasone acetate       |
| prednisolone tebutate       |
| prednisone acetate          |
| prednisolone acetate        |
| mometasone                  |
| fluticasone                 |
| methyl prednisone           |
| pirbuterol                  |
| ciclesonide                 |
| erdosteine                  |
| terbutaline                 |
| fluticasone furoate         |
| glycopyrronium              |
| indacaterol                 |
| ipratropium                 |
| levosalbutamol              |
| clarithromycin              |
| olodaterol                  |
| salbutamol                  |

|               |
|---------------|
| salmeterol    |
| revefenacin   |
| theophylline  |
| salbutamol    |
| aminophylline |
| umeclidinium  |
| vilanterol    |
| prednisone    |
| tiotropium    |

**Table S2: Unique proteins upregulated in BALF (n=95),** Differentially expressed proteins with at least 1.5x fold change increase in the BALF proteome in COPD versus control cohort samples.

| Uniprot ID | Symbol | Entrez Gene Name                                            | Location  | Type(s)          | Fold change | Previously described association with COPD              | References |
|------------|--------|-------------------------------------------------------------|-----------|------------------|-------------|---------------------------------------------------------|------------|
| P00325     | ADH1B  | alcohol dehydrogenase 1B (class I), beta polypeptide        | Cytoplasm | Lipid metabolism | 12.86       | NONE                                                    |            |
| P46439     | GSTM5  | glutathione S-transferase mu 5                              | Cytoplasm | enzyme           | 11.26       | Various GST polymorphisms implicated in lung protection | 3-5        |
| O00487     | PSMD14 | proteasome (prosome, macropain) 26S subunit, non-ATPase, 14 | Cytoplasm | peptidase        | 9.53        | NONE                                                    |            |

|        |        |                                                               |                     |           |      |                                                   |     |
|--------|--------|---------------------------------------------------------------|---------------------|-----------|------|---------------------------------------------------|-----|
| Q86TZ1 | TTC6   | tetratricopeptide repeat domain 6                             | unknown             | other     | 8.68 | NONE                                              |     |
| P02743 | APCS   | amyloid P component, serum                                    | Extracellular Space | pentraxin | 8.23 | Not APCS but Pentraxin 3 in COPD                  | 6-8 |
| Q9UBR2 | CTSZ   | cathepsin Z                                                   | Cytoplasm           | peptidase | 7.92 | NONE                                              |     |
| Q9NP98 | MYOZ1  | myozenin 1                                                    | Cytoplasm           | other     | 7.08 | NONE                                              |     |
| Q13402 | MYO7A  | myosin VIIA                                                   | Cytoplasm           | enzyme    | 6.84 | NONE                                              |     |
| Q49MG5 | MAP9   | microtubule-associated protein 9                              | unknown             | other     | 6.31 | NONE                                              |     |
| Q13642 | FHL1   | four and a half LIM domains 1                                 | Cytoplasm           | other     | 5.53 | NONE                                              |     |
| P02775 | PPBP   | pro-platelet basic protein (chemokine (C-X-C motif) ligand 7) | Extracellular Space | cytokine  | 5.47 | Neutrophil marker increased in severe stable COPD | 9   |
| P21333 | FLNA   | filamin A, alpha                                              | Cytoplasm           | other     | 5.14 | NONE                                              |     |
| Q8NFC6 | BOD1L1 | biorientation of chromosomes                                  | Extracellular Space | other     | 4.43 | NONE                                              |     |

|            |        |                                                                                                               |                        |                     |       |                                                                                   |       |
|------------|--------|---------------------------------------------------------------------------------------------------------------|------------------------|---------------------|-------|-----------------------------------------------------------------------------------|-------|
|            |        | in cell division<br>1-like 1                                                                                  |                        |                     |       |                                                                                   |       |
| P04220     | MUCB   | Ig mu heavy<br>chain disease<br>protein                                                                       | Plasma<br>Membrane     |                     | 4.36  | NONE                                                                              |       |
| P02656     | APOC3  | apolipoprotein<br>C-III                                                                                       | Extracellular<br>Space | Lipid<br>metabolism | 4.24  | NONE                                                                              |       |
| P42330     | AKR1C3 | aldo-keto<br>reductase<br>family 1,<br>member C3 (3-<br>alpha<br>hydroxysteroid<br>dehydrogenase,<br>type II) | Cytoplasm              | enzyme              | 4.11  | NONE                                                                              |       |
| P35749     | MYH11  | myosin, heavy<br>chain 11,<br>smooth muscle                                                                   | Cytoplasm              | other               | 4.01  | Myosin heavy chain<br>variation was noted in<br>COPD but not specific<br>proteins | 10-12 |
| O00522     | KRIT1  | KRIT1, ankyrin<br>repeat<br>containing                                                                        | Plasma<br>Membrane     | other               | 3.89  | NONE                                                                              |       |
| A6NDU<br>8 | CE051  | UPF0600<br>protein C5orf51                                                                                    | unknown                | other               | 3.56  | NONE                                                                              |       |
| P04114     | APOB   | apolipoprotein<br>B (including<br>Ag(x) antigen)                                                              | Extracellular<br>Space | transporter         | 3.556 | NONE                                                                              |       |

|        |          |                                                                                |                     |                  |      |                                               |       |
|--------|----------|--------------------------------------------------------------------------------|---------------------|------------------|------|-----------------------------------------------|-------|
| Q5XKE5 | KRT79    | keratin 79                                                                     | Extracellular Space | other            | 3.43 | NONE                                          |       |
| Q9NWS1 | PARPBP   | PARP1 binding protein                                                          | Nucleus             | other            | 3.42 | NONE                                          |       |
| P12429 | ANXA3    | Annexin A3                                                                     |                     |                  | 3.34 | NONE                                          |       |
| P30838 | ALDH3A1  | aldehyde dehydrogenase 3 family, member A1                                     | Cytoplasm           | Lipid metabolism | 3.33 | None, but is implicated in cell proliferation |       |
| Q6NUK1 | SLC25A24 | solute carrier family 25 (mitochondrial carrier; phosphate carrier), member 24 | Cytoplasm           | other            | 3.33 | NONE                                          |       |
| P00738 | HP       | haptoglobin                                                                    | Extracellular Space | peptidase        | 3.22 | Acute phase reactant associated with COPD     | 13,14 |
| Q16787 | LAMA3    | laminin, alpha 3                                                               | Extracellular Space | other            | 3.2  | Haemophilus and Moraxella binds to laminin    |       |

|        |       |                                                 |                     |                        |      |                                                               |       |
|--------|-------|-------------------------------------------------|---------------------|------------------------|------|---------------------------------------------------------------|-------|
| P02675 | FGB   | fibrinogen beta chain                           | Extracellular Space | other                  | 3.17 | Serum fibrinogen levels in COPD associated with exacerbations | 14-20 |
| P08670 | VIM   | vimentin                                        | Cytoplasm           | cytoskeleton component | 3.12 | Epithelial to mesenchymal transition                          | 21-25 |
| Q7KZI7 | MARK2 | MAP/microtubule affinity-regulating kinase 2    | Cytoplasm           | kinase                 | 3.12 | NONE                                                          |       |
| Q15847 | APM2  | Adipose most abundant gene transcript 2 protein |                     |                        | 3.01 | NONE                                                          |       |
| Q16280 | CNGA2 | cyclic nucleotide gated channel alpha 2         | Plasma Membrane     | ion channel            | 3.01 | NONE                                                          |       |
| O94782 | USP1  | ubiquitin specific peptidase 1                  | Cytoplasm           | peptidase              | 2.9  | NONE                                                          |       |
| Q96C24 | SYTL4 | synaptotagmin-like 4                            | Cytoplasm           | transporter            | 2.82 | NONE                                                          |       |
| P02671 | FIBA  | Fibrinogen alpha chain                          |                     |                        | 2.78 | Serum fibrinogen levels in COPD associated with exacerbations | 14-20 |
| P02679 | FGG   | fibrinogen gamma chain                          | Extracellular Space | other                  | 2.75 | Serum fibrinogen levels in COPD associated with exacerbations | 14-20 |

|        |        |                                            |                     |                         |      |                                                               |          |
|--------|--------|--------------------------------------------|---------------------|-------------------------|------|---------------------------------------------------------------|----------|
| P53004 | BLVRA  | biliverdin reductase A                     | Cytoplasm           | enzyme                  | 2.66 | NONE                                                          |          |
| Q2TVT3 | KGFLP2 | keratinocyte growth factor-like protein 2  | unknown             | other                   | 2.62 | NONE                                                          |          |
| P23284 | PPIB   | peptidylprolyl isomerase B (cyclophilin B) | Cytoplasm           | enzyme                  | 2.55 | NONE                                                          |          |
| P17931 | LGALS3 | lectin, galactoside-binding, soluble, 3    | Extracellular Space | other                   | 2.52 | Increased Gal-3 in small airways                              | 26,27    |
| P13645 | K1C10  | Keratin type I cytoskeletal 10             |                     |                         | 2.47 | NONE                                                          |          |
| Q9NX58 | LYAR   | Ly1 antibody reactive homolog (mouse)      | Plasma Membrane     | other                   | 2.37 | NONE                                                          |          |
| O95497 | VNN1   | vanin 1                                    | Plasma Membrane     | Enzyme/lipid metabolism | 2.34 | NONE                                                          |          |
| P16152 | CBR1   | carbonyl reductase 1                       | Cytoplasm           | enzyme                  | 2.34 | NONE                                                          |          |
| P23771 | GATA3  | GATA binding protein 3                     | Nucleus             | transcription regulator | 2.33 | NONE                                                          |          |
| P01023 | A2M    | alpha-2-macroglobulin                      | Extracellular Space | transporter             | 2.31 | A protease inhibitor that has increased serum levels found in | 13,28-31 |



|        |           |                                                                                                   |                     |       |      |                                                                                                                                                                                                         |                                              |
|--------|-----------|---------------------------------------------------------------------------------------------------|---------------------|-------|------|---------------------------------------------------------------------------------------------------------------------------------------------------------------------------------------------------------|----------------------------------------------|
|        |           |                                                                                                   |                     |       |      |                                                                                                                                                                                                         | patients with alpha-1 antitrypsin deficiency |
| Q15149 | PLEC      | plectin                                                                                           | Cytoplasm           | other | 2.31 | NONE                                                                                                                                                                                                    |                                              |
| P62328 | TYB6      | Thymosin beta_4                                                                                   |                     |       | 2.28 | NONE                                                                                                                                                                                                    |                                              |
| Q6UXR4 | SERPINA13 | serpin peptidase inhibitor, clade A (alpha-1 antiproteinase, antitrypsin), member 13 (pseudogene) | Extracellular Space | other | 2.26 | A serpin peptidase inhibitor that is in the same family of peptidase inhibitor as alpha-1 antitrypsin (a serpin peptidase inhibitor, clade A, member 1) implicated in protease-antiprotease homeostasis | 32,33                                        |
| Q14019 | COTL1     | coactosin-like 1                                                                                  | Cytoplasm           | other | 2.25 | NONE                                                                                                                                                                                                    |                                              |
| P03950 | ANGI      | Angiogenin                                                                                        |                     |       | 2.24 | Increased in induced sputum from stable COPD individuals compared to healthy smokers                                                                                                                    | 34                                           |
| Q9UK76 | HN1       | hematological and                                                                                 | Nucleus             | other | 2.21 | NONE                                                                                                                                                                                                    |                                              |

|        |        |                                                                                |                     |                   |       |                                                                                     |    |
|--------|--------|--------------------------------------------------------------------------------|---------------------|-------------------|-------|-------------------------------------------------------------------------------------|----|
|        |        | neurological<br>expressed 1                                                    |                     |                   |       |                                                                                     |    |
| P02647 | APOA1  | apolipoprotein A-I                                                             | Extracellular Space | Lipid metabolism  | 2.13  | COPD biomarker                                                                      | 35 |
| P07108 | DBI    | diazepam binding inhibitor (GABA receptor modulator, acyl-CoA binding protein) | Cytoplasm           | other             | 2.13  | NONE                                                                                |    |
| P55822 | SH3BGR | SH3 domain binding glutamic acid-rich protein                                  | Cytoplasm           | other             | 2.13  | NONE                                                                                |    |
| P08758 | ANXA5  | annexin A5                                                                     | Plasma Membrane     | Apoptosis pathway | 2.1   | Decreases macrophage efferocytosis and elastase-induced pulmonary emphysema in mice | 36 |
| P37837 | TALDO1 | transaldolase 1                                                                | Cytoplasm           | enzyme            | 2.09  | NONE                                                                                |    |
| P04259 | KRT6B  | keratin 6B                                                                     | Cytoplasm           | other             | 2.049 | NONE                                                                                |    |
| P41222 | PTGDS  | prostaglandin D2 synthase 21kDa (brain)                                        | Cytoplasm           | enzyme            | 2.03  | Increased RNA expression in the human lung tissue of                                | 37 |

| subjects with moderate versus mild COPD |          |                                                |                     |                  |      |                                                                                               |
|-----------------------------------------|----------|------------------------------------------------|---------------------|------------------|------|-----------------------------------------------------------------------------------------------|
| Q9BWM5                                  | ZNF416   | zinc finger protein 416                        | Nucleus             | other            | 1.98 | NONE                                                                                          |
| Q9HCE9                                  | ANO8     | anoctamin 8                                    | Extracellular Space | other            | 1.98 | NONE                                                                                          |
| Q96PP8                                  | GBP5     | guanylate binding protein 5                    | Plasma Membrane     | enzyme           | 1.95 | NONE                                                                                          |
| Q92888                                  | ARHGEF1  | Rho guanine nucleotide exchange factor (GEF) 1 | Cytoplasm           | other            | 1.94 | NONE                                                                                          |
| P51884                                  | LUM      | lumican                                        | Extracellular Space | other            | 1.93 | Extracellular matrix component 38                                                             |
| P62937                                  | PPIA     | Peptidyl_prolyl cis_trans isomerase A          |                     |                  | 1.92 | Increased in lung tissue from smokers with COPD versus never-smokers, and non-COPD smokers 39 |
| P09972                                  | ALDOC    | aldolase C, fructose-bisphosphate              | Cytoplasm           | Metabolic enzyme | 1.91 | NONE                                                                                          |
| Q5JYT7                                  | KIAA1755 | KIAA1755                                       | unknown             | other            | 1.91 | NONE                                                                                          |

|        |         |                                                                                                              |                     |              |      |      |
|--------|---------|--------------------------------------------------------------------------------------------------------------|---------------------|--------------|------|------|
| P30086 | PEBP1   | phosphatidylethanolamine binding protein 1                                                                   | Cytoplasm           | other        | 1.9  | NONE |
| O75368 | SH3BGR1 | SH3 domain binding glutamic acid-rich protein like                                                           | Cytoplasm           | other        | 1.89 | NONE |
| Q4G0N8 | SLC9C1  | solute carrier family 9, subfamily C (Na <sup>+</sup> -transporting carboxylic acid decarboxylase), member 1 | unknown             | other        | 1.89 | NONE |
| O75874 | IDH1    | isocitrate dehydrogenase 1 (NADP <sup>+</sup> ), soluble                                                     | Cytoplasm           | enzyme       | 1.88 | NONE |
| Q13421 | MSLN    | mesothelin                                                                                                   | Extracellular Space | other        | 1.88 | NONE |
| Q9Y6W5 | WASF2   | WAS protein family, member 2                                                                                 | Cytoplasm           | cytoskeleton | 1.87 | NONE |

|        |        |                                             |                            |        |      |                                                                                                                  |             |
|--------|--------|---------------------------------------------|----------------------------|--------|------|------------------------------------------------------------------------------------------------------------------|-------------|
| P50224 | ST1A3  | Sulfotransferase<br>1A3/1A4                 |                            |        | 1.86 | NONE                                                                                                             |             |
| Q9Y2K3 | MYH15  | myosin, heavy<br>chain 15                   | Extracell<br>ular<br>Space | other  | 1.86 | Muscle dysfunction<br>and aberrations of<br>myosin composition<br>within muscle has been<br>associated with COPD | 10,11,40-45 |
|        |        |                                             |                            |        |      | NONE                                                                                                             |             |
| Q16881 | TXNRD1 | thioredoxin<br>reductase 1                  | Cytoplas<br>m              | enzyme | 1.82 |                                                                                                                  |             |
| P37802 | TAGLN2 | transgelin 2                                | Cytoplas<br>m              | other  | 1.73 | NONE                                                                                                             |             |
| P35527 | KRT9   | keratin 9                                   | Cytoplas<br>m              | other  | 1.71 | NONE                                                                                                             |             |
| P09104 | ENO2   | enolase 2<br>(gamma,<br>neuronal)           | Cytoplas<br>m              | enzyme | 1.7  | NONE                                                                                                             |             |
|        |        |                                             |                            |        |      | NONE                                                                                                             |             |
| P40925 | MDH1   | malate<br>dehydrogenase<br>1, NAD (soluble) | Cytoplas<br>m              | enzyme | 1.68 |                                                                                                                  |             |

|        |         |                                         |                     |                         |      |                                                                                      |       |
|--------|---------|-----------------------------------------|---------------------|-------------------------|------|--------------------------------------------------------------------------------------|-------|
| P30041 | PRDX6   | peroxiredoxin 6                         | Cytoplasm           | enzyme                  | 1.66 | NONE                                                                                 |       |
| P04264 | K2C1    | Keratin type II cytoskeletal 1          |                     |                         | 1.65 | NONE                                                                                 |       |
| P61088 | UBE2N   | ubiquitin-conjugating enzyme E2N        | Cytoplasm           | enzyme                  | 1.65 | CS induces UBE2N                                                                     | 46    |
| P06319 | LV605   | Ig lambda chain V_VI region EB4         | Extracellular Space | immunoglobulin          | 1.64 | NONE                                                                                 |       |
| P20962 | PTMS    | parathymosin                            | Nucleus             | other                   | 1.63 | NONE                                                                                 |       |
| Q8N0Y7 | PGAM4   | phosphoglycerate mutase family member 4 | unknown             | phosphatase             | 1.63 | NONE                                                                                 |       |
| P06733 | ENO1    | enolase 1, (alpha)                      | Cytoplasm           | transcription regulator | 1.61 | NONE                                                                                 |       |
| P09467 | FBP1    | fructose-1,6-bisphosphatase 1           | Cytoplasm           | phosphatase             | 1.6  | NONE                                                                                 |       |
| P17066 | HSPA6   | heat shock 70kDa protein 6 (HSP70B')    | unknown             | other                   | 1.59 | Increased proteins levels in patients with COPD treated with Inhaled Corticosteroids | 47-49 |
| Q96PX6 | CCDC85A | coiled-coil domain containing 85A       | unknown             | other                   | 1.57 | NONE                                                                                 |       |

|        |        |                                 |           |              |      |                                                                                                                                   |       |
|--------|--------|---------------------------------|-----------|--------------|------|-----------------------------------------------------------------------------------------------------------------------------------|-------|
| P23528 | CFL1   | cofilin 1 (non-muscle)          | Nucleus   | cytoskeleton | 1.56 | NONE                                                                                                                              |       |
| P63261 | ACTG   | Actin_cytoplasmic 2             | Cytoplasm |              | 1.56 | NONE                                                                                                                              |       |
| P06703 | S100A6 | S100 calcium binding protein A6 | Cytoplasm | transporter  | 1.55 | Calcium binding protein involved in neutrophil activation and protein levels elevated in sputum from COPD versus control subjects | 50-52 |

**Table S3: Unique proteins downregulated in BALF (n=138).** Differentially expressed proteins with at least 1.5x fold change decrease in the BALF proteome in COPD versus control cohort samples.

| Uniprot ID | Symbol  | Entrez Gene Name                             | Location            | Type(s)                        | Fold change | Previously described association with COPD                         | References |
|------------|---------|----------------------------------------------|---------------------|--------------------------------|-------------|--------------------------------------------------------------------|------------|
| Q9HCH0     | NCKAP5L | NCK-associated protein 5-like                | unknown             | other                          | -8.55       | NONE                                                               |            |
| Q01995     | TAGLN   | transgelin                                   | Cytoplasm           | other                          | -8.11       | NONE                                                               |            |
| Q29865     | HLA-C   | major histocompatibility complex, class I, C | Plasma Membrane     | other                          | -7.63       | GWAS analysis in the ECLIPSE study noted a SNP in the HLA-C region | 53         |
| P14314     | PRKCSH  | protein kinase C substrate 80K-H             | Cytoplasm           | enzyme                         | -6.84       | NONE                                                               |            |
| B3KS81     | SRRM5   | serine/arginine repetitive matrix 5          | unknown             | other                          | -6.06       | NONE                                                               |            |
| P20142     | PEPC    | Gastricsin                                   | Extracellular Space |                                | -5.25       | NONE                                                               |            |
| O95185     | UNC5C   | unc-5 homolog C                              | Plasma Membrane     | transmembrane receptor/ netrin | -5.11       | NONE                                                               |            |
| Q9Y3P9     | RABGAP1 | RAB GTPase activating protein 1              | Cytoplasm           | other                          | -5.04       | NONE                                                               |            |



|        |        |                                                                 |                     |                            |       |                                                                                                        |       |
|--------|--------|-----------------------------------------------------------------|---------------------|----------------------------|-------|--------------------------------------------------------------------------------------------------------|-------|
| Q7Z3U7 | MON2   | MON2 homolog (S. cerevisiae)                                    | Cytoplasm           | other                      | -5.02 | NONE                                                                                                   |       |
| Q9NWN3 | FBXO34 | F-box protein 34                                                | unknown             | other                      | -4.80 | NONE                                                                                                   |       |
| O60885 | BRD4   | bromodomain containing 4                                        | Nucleus             | kinase                     | -4.33 | NONE                                                                                                   |       |
| Q9UHX3 | EMR2   | egf-like module containing, Mucin-like, hormone receptor-like 2 | Plasma Membrane     | G-protein coupled receptor | -4.32 | NONE                                                                                                   |       |
| Q9NSY1 | BMP2K  | BMP2 inducible kinase                                           | Nucleus             | kinase                     | -4.03 | NONE                                                                                                   |       |
| Q9H0P7 | CF059  | Putative uncharacterized protein encoded by NCRNA00241          |                     |                            | -3.96 | NONE                                                                                                   |       |
| O75419 | CDC45  | cell division cycle 45 homolog                                  | Nucleus             | other                      | -3.68 | NONE                                                                                                   |       |
| P03950 | ANG    | angiogenin, ribonuclease, RNase A family, 5                     | Extracellular Space | enzyme                     | -3.59 | NONE                                                                                                   |       |
| Q8IWL2 | SFTPA1 | surfactant protein A1                                           | Extracellular Space | transporter                | -3.59 | Imbalances of the surfactant proteins, major components of alveolar fluid have been implicated in COPD | 54-60 |
| Q1ED39 | CP088  | Protein C16orf88                                                |                     |                            | -3.57 | NONE                                                                                                   |       |
| P54750 | PDE1A  | phosphodiesterase 1A, calmodulin-dependent                      | Cytoplasm           | enzyme                     | -3.48 | NONE                                                                                                   |       |

|        |         |                                                       |                     |                         |       |                                                                     |       |
|--------|---------|-------------------------------------------------------|---------------------|-------------------------|-------|---------------------------------------------------------------------|-------|
| Q8ND24 | RNF214  | ring finger protein 214                               | unknown             | other                   | -3.46 | NONE                                                                |       |
| Q96N16 | JAKMIP1 | janus kinase and microtubule interacting protein 1    | Cytoplasm           | other                   | -3.41 | NONE                                                                |       |
| Q14980 | NUMA1   | nuclear mitotic apparatus protein 1                   | Nucleus             | other                   | -3.26 | NONE                                                                |       |
| Q9UI36 | DACH1   | dachshund homolog 1                                   | Nucleus             | transcription regulator | -3.03 | NONE                                                                |       |
| Q9UHG3 | PCYOX1  | prenylcysteine oxidase 1                              | Cytoplasm           | enzyme                  | -3.03 | NONE                                                                |       |
| O14905 | WNT9B   | wingless-type MMTV integration site family, member 9B | Extracellular Space | Signal transduction     | -3.03 | NONE                                                                |       |
| Q99996 | AKAP9   | A kinase (PRKA) anchor protein (yotiao) 9             | Cytoplasm           | other                   | -3.02 | NONE                                                                |       |
| Q9Y2P7 | ZNF256  | zinc finger protein 256                               | Nucleus             | transcription regulator | -3.00 | NONE                                                                |       |
| P02747 | C1QC    | complement component 1, q subcomponent, C chain       | Extracellular Space | other                   | -3.00 | NONE                                                                |       |
| O00750 | PIK3C2B | phosphoinositide-3-kinase, class 2, beta polypeptide  | Cytoplasm           | kinase                  | -3.00 | Associated with glucocorticoid sensitivity and inflammation in COPD | 61-63 |
| Q9P2N5 | RBM27   | RNA binding motif protein 27                          | Nucleus             | other                   | -3.00 | NONE                                                                |       |
| Q9Y520 | PRRC2C  | proline-rich coiled-coil 2C                           | Cytoplasm           | other                   | -2.92 | NONE                                                                |       |

|        |         |                                                                            |                     |                                              |       |                                 |       |
|--------|---------|----------------------------------------------------------------------------|---------------------|----------------------------------------------|-------|---------------------------------|-------|
| Q9P2Y4 | ZNF219  | zinc finger protein 219                                                    | Nucleus             | transcription regulator                      | -2.92 | NONE                            |       |
| O43813 | LANCL1  | LanC lantibiotic synthetase component C-like 1 (bacterial)                 | Plasma Membrane     | other                                        | -2.92 | NONE                            |       |
| P01714 | LV301   | Ig lambda chain V_III region SH                                            | Extracellular Space | immunoglobulin                               | -2.92 | NONE                            |       |
| O75264 | CS077   | Transmembrane protein C19orf77                                             |                     |                                              | -2.92 | NONE                            |       |
| A6NMX2 | EIF4E1B | eukaryotic translation initiation factor 4E family member 1B               | unknown             | other                                        | -2.92 | NONE                            |       |
| Q8IYD8 | FANCM   | Fanconi anemia, complementation group M                                    | Nucleus             | enzyme                                       | -2.92 | NONE                            |       |
| Q8TC84 | FANK1   | Fibronectin type III and ankyrin repeat domains 1                          | Nucleus             | transcription regulator                      | -2.92 | NONE                            |       |
| Q96NX9 | DACH2   | dachshund homolog 2                                                        | Nucleus             | other                                        | -2.90 | NONE                            |       |
| Q9BVG8 | KIFC3   | kinesin family member C3                                                   | Cytoplasm           | enzyme                                       | -2.87 | NONE                            |       |
| O14920 | IKBKB   | inhibitor of kappa light polypeptide gene enhancer in B-cells, kinase beta | Cytoplasm           | kinase                                       | -2.75 | Implicated in COPD inflammation | 64-66 |
| Q92738 | USP6NL  | USP6 N-terminal like/ RAB5 effector RN-tre                                 | Plasma Membrane     | Cytoskeleton element involved in pinocytosis | -2.75 | NONE                            |       |

|        |          |                                                |                     |                        |       |                                                                                     |          |
|--------|----------|------------------------------------------------|---------------------|------------------------|-------|-------------------------------------------------------------------------------------|----------|
| Q96JB5 | CDK5RAP3 | CDK5 regulatory subunit associated protein 3   | Cytoplasm           | other                  | -2.74 | NONE                                                                                |          |
| Q9UEW3 | MARCO    | macrophage receptor with collagenous structure | Plasma Membrane     | transmembrane receptor | -2.74 | A macrophage scavenger receptor involved in bacterial phagocytosis in COPD          | 67,68    |
| Q13724 | MOGS     | mannosyl-oligosaccharide glucosidase           | Cytoplasm           | enzyme                 | -2.68 | NONE                                                                                |          |
| P51674 | GPM6A    | glycoprotein M6A                               | Plasma Membrane     | ion channel            | -2.68 | NONE                                                                                |          |
| Q16651 | PRSS8    | protease, serine, 8                            | Extracellular Space | peptidase              | -2.63 | NONE                                                                                |          |
| O96009 | NAPSA    | napsin A aspartic peptidase                    | Extracellular Space | peptidase              | -2.58 | NONE                                                                                |          |
| Q9NVX2 | NLE1     | notchless homolog 1 (Drosophila)               | Nucleus             | enzyme                 | -2.54 | NONE                                                                                |          |
| P02751 | FN1      | fibronectin 1                                  | Extracellular Space | enzyme                 | -2.53 | Matrix protein involved in fibroblast proliferation implicated in COPD pathogenesis | 38,69-73 |

|        |         |                                                            |                     |           |       |                                                                                                        |             |
|--------|---------|------------------------------------------------------------|---------------------|-----------|-------|--------------------------------------------------------------------------------------------------------|-------------|
| Q13023 | AKAP6   | A kinase (PRKA) anchor protein 6                           | Nucleus             | other     | -2.53 | NONE                                                                                                   |             |
| Q5VWQ0 | RSBN1   | round spermatid basic protein 1                            | Nucleus             | other     | -2.53 | NONE                                                                                                   |             |
| Q9UGM5 | FETUB   | Fetuin B                                                   | Extracellular Space | other     | -2.49 | NONE                                                                                                   |             |
| Q9Y2G8 | DNAJC16 | DnaJ (Hsp40) homolog, subfamily C, member 16               | unknown             | other     | -2.45 | NONE                                                                                                   |             |
| P35247 | SFTPD   | surfactant protein D                                       | Extracellular Space | other     | -2.44 | Imbalances of the surfactant proteins, major components of alveolar fluid have been implicated in COPD | 54,56,74-79 |
| Q2TBE0 | CWF19L2 | CWF19-like 2, cell cycle control                           | unknown             | other     | -2.42 | NONE                                                                                                   |             |
| Q9BYF1 | ACE2    | angiotensin I converting enzyme (peptidyl-dipeptidase A) 2 | Plasma Membrane     | peptidase | -2.41 |                                                                                                        | 80          |
| O95969 | SCGB1D2 | secretoglobulin, family 1D, member 2                       | Extracellular Space | other     | -2.40 | NONE                                                                                                   |             |
| P78367 | NKX32   | Homeobox protein Nkx_3.2                                   |                     |           | -2.40 | NONE                                                                                                   |             |
| Q9P275 | USP36   | ubiquitin specific peptidase 36                            | Nucleus             | peptidase | -2.40 | NONE                                                                                                   |             |

|        |        |                              |           |                         |       |                |       |
|--------|--------|------------------------------|-----------|-------------------------|-------|----------------|-------|
| O43464 | HTRA2  | HtrA serine peptidase 2      | Cytoplasm | peptidase               | -2.40 | NONE           |       |
| O60281 | ZNF292 | zinc finger protein 292      | Nucleus   | transcription regulator | -2.38 | NONE           |       |
| Q96JM2 | ZNF462 | zinc finger protein 462      | Nucleus   | other                   | -2.37 | NONE           |       |
| P27487 | DPP4   | dipeptidyl-peptidase 4       | Plasma    |                         |       | Putative       | serum |
|        |        |                              | Membrane  | peptidase               | -2.33 | COPD biomarker | 81    |
| Q86SX3 | CN080  | Uncharacterized protein      |           |                         |       | NONE           |       |
|        |        | C14orf80                     |           |                         | -2.28 |                |       |
| Q9UJV3 | MID2   | midline 2                    | Cytoplasm | other                   | -2.13 | NONE           |       |
| Q6ZU80 | CEP128 | centrosomal protein 128kDa   | unknown   | other                   | -2.12 | NONE           |       |
| Q01968 | OCRL   | Inositol polyphosphate       | Cytoplasm |                         |       | NONE           |       |
|        |        | 5_phosphatase                | m         | phosphatase             | -2.11 |                |       |
| P42696 | RBM34  | RNA binding motif protein 34 | Nucleus   | other                   | -2.11 | NONE           |       |

|        |         |                                                                          |           |                       |       |                                                                                                                      |
|--------|---------|--------------------------------------------------------------------------|-----------|-----------------------|-------|----------------------------------------------------------------------------------------------------------------------|
| P0CB38 | PABPC4L | poly(A) binding protein,<br>cytoplasmic 4-like                           | unknown   | other                 | -2.09 | NONE                                                                                                                 |
| P49770 | EIF2B2  | eukaryotic translation<br>initiation factor 2B, subunit 2<br>beta, 39kDa | Cytoplasm | translation regulator | -2.09 | NONE                                                                                                                 |
| P11678 | EPX     | eosinophil peroxidase                                                    | Cytoplasm | enzyme                | -2.06 | NONE, Although<br>one reference<br>examined EPX in<br>subjects, it is was<br>NOT differentially<br>expressed in COPD |
| B1AJZ9 | FHAD1   | forkhead-associated (FHA)<br>phosphopeptide binding<br>domain 1          | unknown   | other                 | -2.04 | NONE                                                                                                                 |

|        |                              |                                                             |                 |                        |      |       |
|--------|------------------------------|-------------------------------------------------------------|-----------------|------------------------|------|-------|
| P54920 | NAPA                         | N-ethylmaleimide-sensitive factor attachment protein, alpha | Cytoplasm       | other                  | NONE | -2.03 |
| P01771 | HV310                        | Ig heavy chain V_III region HIL                             | Extracellular   | immunoglobulin         | NONE | -2.03 |
| Q9Y2H0 | DLGAP4                       | discs, large homolog-associated protein 4                   | Plasma Membrane | other                  | NONE | -2.01 |
| Q07954 | LRP1<br>(includes EG:16971 ) | low density lipoprotein receptor-related protein 1          | Plasma Membrane | transmembrane receptor | NONE | -2.00 |



|        |         |                                                                         |                    |           |       |      |
|--------|---------|-------------------------------------------------------------------------|--------------------|-----------|-------|------|
| Q13702 | RAPSN   | receptor-associated protein<br>of the synapse                           | Plasma<br>Membrane | other     | -2.00 | NONE |
| Q13620 | CUL4B   | cullin 4B                                                               | Nucleus            | other     | -2.00 | NONE |
| P15291 | B4GALT1 | UDP-Gal:betaGlcNAc beta<br>1,4- galactosyltransferase,<br>polypeptide 1 | Cytoplasm          | enzyme    | -1.99 | NONE |
| P04259 | K2C6B   | Keratin type II cytoskeletal 6B                                         |                    |           | -1.99 | NONE |
| P14384 | CPM     | carboxypeptidase M                                                      | Plasma<br>Membrane | peptidase | -1.98 | NONE |
| Q5HYK9 | ZNF667  | zinc finger protein 667                                                 | Nucleus            | other     | -1.97 | NONE |
| Q5VVM6 | CCDC30  | coiled-coil domain containing<br>30                                     | unknown            | other     | -1.97 | NONE |

|        |       |                               |           |                |       |
|--------|-------|-------------------------------|-----------|----------------|-------|
| Q16181 | SEP7  | septin 7                      | Cytoplas  | other          | NONE  |
|        |       |                               | m         |                | -1.97 |
|        |       |                               | Extracell |                | NONE  |
|        | HV302 | Ig heavy chain V_III region   | ular      | immunoglobulin |       |
| P01763 |       | WEA                           | Space     |                | -1.96 |
|        |       |                               | Extracell |                | NONE  |
| P07225 | PROS1 | protein S (alpha)             | ular      | other          |       |
|        |       |                               | Space     |                | -1.96 |
|        |       |                               | Extracell |                | NONE  |
|        | HV319 | Ig heavy chain V_III region   | ular      | immunoglobulin |       |
| P01780 |       | JON                           | Space     |                | -1.95 |
|        |       |                               | Extracell |                | NONE  |
|        | KV113 |                               | ular      | immunoglobulin |       |
| P01605 |       | Ig kappa chain V_I region Lay | Space     |                | -1.95 |

|        |        |                                |           |                |       |
|--------|--------|--------------------------------|-----------|----------------|-------|
|        |        |                                | Extracell |                | NONE  |
|        | KV119  |                                | ular      | immunoglobulin |       |
| P01611 |        | Ig kappa chain V_I region Wes  | Space     |                | -1.93 |
|        |        |                                | Extracell |                | NONE  |
|        | KV120  | Ig kappa chain V_I region      | ular      | immunoglobulin |       |
| P01612 |        | Mev                            | Space     |                | -1.93 |
|        |        |                                | Extracell |                | NONE  |
| Q8NB66 | UNC13C | unc-13 homolog C               | Cytoplas  | other          | NONE  |
|        |        |                                | m         |                | -1.90 |
|        |        |                                | Extracell |                | NONE  |
| A4D1S5 | RAB19  | RAB19, member RAS              | Cytoplas  | enzyme         | NONE  |
|        |        | oncogene family                | m         |                | -1.90 |
|        |        |                                | Extracell |                | NONE  |
| Q9Y613 | FHOD1  | formin homology 2 domain       | Nucleus   | other          | NONE  |
|        |        | containing 1                   |           |                | -1.89 |
|        |        |                                | Extracell |                | NONE  |
| Q86Y33 | CDC20B | cell division cycle 20 homolog | unknown   | other          | NONE  |
|        |        | B                              |           |                | -1.87 |

|            |              |                                                                          |                            |                |                                                                          |       |
|------------|--------------|--------------------------------------------------------------------------|----------------------------|----------------|--------------------------------------------------------------------------|-------|
| P06317     | LV603        | Ig lambda chain V_VI region<br>SUT                                       | Extracell<br>ular<br>Space | immunoglobulin | NONE                                                                     | -1.86 |
| Q5FWF4     | ZRANB3       | zinc finger, RAN-binding<br>domain containing 3                          | unknown                    | enzyme         | NONE                                                                     | -1.83 |
| Q0VAM<br>2 | RASGEF1<br>B | RasGEF domain family,<br>member 1B                                       | unknown                    | other          | NONE                                                                     | -1.82 |
| Q9HAV0     | GNB4         | guanine nucleotide binding<br>protein (G protein), beta<br>polypeptide 4 | Plasma<br>Membra<br>ne     | enzyme         | NONE                                                                     | -1.79 |
| P16070     | CD44         | CD44 molecule (Indian blood<br>group)                                    | Plasma<br>Membra<br>ne     | enzyme         | CD44 HA receptor is<br>implicated in<br>macrophage<br>phagocytic ability | -1.79 |

9,83-86

|        |          |                                                         |                 |                        |       |                                                                                           |
|--------|----------|---------------------------------------------------------|-----------------|------------------------|-------|-------------------------------------------------------------------------------------------|
|        |          |                                                         |                 |                        |       | and appears to be decreased in COPD                                                       |
| P16144 | ITGB4    | integrin, beta 4                                        | Plasma Membrane | transmembrane receptor | -1.77 | NONE                                                                                      |
| Q12873 | CHD3     | chromodomain helicase DNA binding protein 3             | Nucleus         | enzyme                 | -1.75 | NONE                                                                                      |
| P15151 | PVR      | poliovirus receptor                                     | Plasma Membrane | other                  | -1.75 | NONE                                                                                      |
| Q08380 | LGALS3BP | lectin, galactoside-binding, soluble, 3 binding protein | Plasma Membrane | transmembrane receptor | -1.75 | NONE for the specific protein, but as a binding protein for a lectin, its associates with |

|        |              |                                                    |                            |       |       |                                                                                    |
|--------|--------------|----------------------------------------------------|----------------------------|-------|-------|------------------------------------------------------------------------------------|
|        |              |                                                    |                            |       |       | galectin 3 which<br>seems to regulate<br>macrophage<br>efferocytosis in<br>COPD, , |
| Q9HBR0 | SLC38A1<br>0 | solute carrier family 38,<br>member 10             | unknown                    | other | -1.74 | NONE                                                                               |
| Q6Q759 | SPAG17       | sperm associated antigen 17                        | unknown                    | other | -1.73 | NONE                                                                               |
| Q15582 | TGFBI        | transforming growth factor,<br>beta-induced, 68kDa | Extracell<br>ular<br>Space | other | -1.73 | NONE                                                                               |
| A6NCL7 | ANKRD33<br>B | ankyrin repeat domain 33B                          | unknown                    | other | -1.72 | NONE                                                                               |

|        |         |                                                                          |               |                  |       |
|--------|---------|--------------------------------------------------------------------------|---------------|------------------|-------|
| Q8TEU7 | RAPGEF6 | Rap guanine nucleotide exchange factor (GEF) 6                           | Plasma        |                  | NONE  |
|        |         |                                                                          | Membrane      | other            | -1.72 |
| P01619 | KV301   | Ig kappa chain V_III region B6                                           | Extracellular |                  | NONE  |
|        |         |                                                                          | ular          | immunoglobulin   | -1.72 |
| Q8TCU6 | PREX1   | phosphatidylinositol-3,4,5-trisphosphate-dependent Rac exchange factor 1 | Cytoplasm     | other            | NONE  |
|        |         |                                                                          |               |                  | -1.70 |
| P04114 | APOB    | apolipoprotein B (including Ag(x) antigen)                               | Extracellular |                  | NONE  |
|        |         |                                                                          | ular          | Lipid metabolism | -1.68 |
| P06314 | KV40    | Ig kappa chain V_IV region B17                                           | Extracellular |                  | NONE  |
|        |         |                                                                          | ular          | immunoglobulin   | -1.67 |

|        |       |                                                                             |                 |                        |                                                                   |       |
|--------|-------|-----------------------------------------------------------------------------|-----------------|------------------------|-------------------------------------------------------------------|-------|
| P01859 | IGHG2 | immunoglobulin heavy constant gamma 2 (G2m marker)                          | Plasma Membrane | immunoglobulin         | NONE                                                              | -1.67 |
| P17174 | GOT1  | glutamic-oxaloacetic transaminase 1, soluble (aspartate aminotransferase 1) | Cytoplasm       | enzyme                 | NONE                                                              | -1.67 |
| Q02818 | NUCB1 | nucleobindin 1                                                              | Cytoplasm       | other                  | NONE                                                              | -1.67 |
| P05362 | ICAM1 | intercellular adhesion molecule 1                                           | Plasma Membrane | transmembrane receptor | Discordant of ICAM in COPD in literature compared to our findings | -1.66 |



|        |        |                                 |           |                   |  |                                                   |
|--------|--------|---------------------------------|-----------|-------------------|--|---------------------------------------------------|
| Q6UX72 | B3GNT9 | UDP-GlcNAc:betaGal beta-        |           |                   |  | NONE                                              |
|        |        | 1,3-N-                          | unknown   | enzyme            |  |                                                   |
|        |        | acetylglucosaminyltransferase 9 |           |                   |  | -1.65                                             |
| P52823 | STC1   |                                 | Extracell |                   |  | NONE                                              |
|        |        | stanniocalcin 1                 | ular      | kinase            |  |                                                   |
|        |        |                                 | Space     |                   |  | -1.65                                             |
| P36222 | CHI3L1 |                                 | Extracell |                   |  | Increased in the 97-99                            |
|        |        | chitinase 3-like 1              | ular      | Tissue remodeling |  | serum and BAL of smokers with COPD                |
|        |        |                                 | Space     |                   |  | compared to never smokers or smokers without COPD |
|        |        |                                 |           |                   |  | -1.65                                             |

|            |         |                                                                          |                            |                       |                                                            |                  |
|------------|---------|--------------------------------------------------------------------------|----------------------------|-----------------------|------------------------------------------------------------|------------------|
| Q96JH7     | VCPIP1  | valosin containing protein<br>(p97)/p47 complex<br>interacting protein 1 | Cytoplas<br>m              | peptidase             | NONE                                                       | -1.64            |
| O95436     | SLC34A2 | solute carrier family 34<br>(sodium phosphate), member<br>2              | Plasma<br>Membr<br>ne      | transporter           | NONE                                                       | -1.64            |
| P46199     | MTIF2   | mitochondrial translational<br>initiation factor 2                       | Cytoplas<br>m              | translation regulator | NONE                                                       | -1.64            |
| Q86SQ7     | SDCCAG8 | serologically defined colon<br>cancer antigen 8                          | Cytoplas<br>m              | other                 | NONE                                                       | -1.64            |
| Q8N7W<br>2 | BEND7   | BEN domain containing 7                                                  | unknown                    | other                 | NONE                                                       | -1.61            |
| P01024     | C3      | complement component 3                                                   | Extracell<br>ular<br>Space | peptidase             | Serum levels of C3<br>was decreased in<br>serum and sputum | 100-102<br>-1.58 |

|        |        |                                                            |           |                               | of subjects with                                    |         |
|--------|--------|------------------------------------------------------------|-----------|-------------------------------|-----------------------------------------------------|---------|
|        |        |                                                            |           |                               | COPD                                                |         |
| P07998 | RNASE1 | ribonuclease, RNase A family,<br>1 (pancreatic)            | Extracell | enzyme                        | NONE                                                |         |
|        |        |                                                            | ular      |                               |                                                     |         |
| P00739 | HPR    | haptoglobin-related protein                                | Space     | peptidase                     | -1.58                                               |         |
|        |        |                                                            | Extracell |                               | NONE                                                |         |
| Q76L83 | ASXL2  | additional sex combs like 2                                | ular      | other                         |                                                     |         |
|        |        |                                                            | Space     |                               | -1.57                                               |         |
| Q8NFJ5 | GPRC5A | G protein-coupled receptor,<br>family C, group 5, member A | Plasma    | G-protein coupled<br>receptor | Decreased in lung                                   | 103,104 |
|        |        |                                                            | Membrane  |                               | epithelia associated<br>with lung<br>adenocarcinoma |         |
|        |        |                                                            | ne        |                               | -1.57                                               |         |

|        |        |                                                                                                        |                        |                         |  |                                                                                   |       |
|--------|--------|--------------------------------------------------------------------------------------------------------|------------------------|-------------------------|--|-----------------------------------------------------------------------------------|-------|
|        |        |                                                                                                        |                        |                         |  | compared to<br>epithelia from<br>subjects with COPD<br>or never smokers           |       |
| Q7Z7M9 | GALNT5 | UDP-N-acetyl-alpha-D-<br>galactosamine:polypeptide N-<br>acetylgalactosaminyltransferase 5 (GalNAc-T5) | Cytoplasm              | enzyme                  |  | NONE                                                                              | -1.57 |
| P06331 | HV209  | Ig heavy chain V_H region<br>ARH_77                                                                    | Extracellular<br>Space | immunoglobulin          |  | NONE                                                                              | -1.57 |
| P15941 | MUC1   | Mucin 1, cell surface<br>associated                                                                    | Plasma<br>Membrane     | transcription regulator |  | Levels are affected<br>by age and smoking<br>in lung tissue,<br>sputum and plasma | -1.56 |

56,105,106

|        |        |                                                    |                     |                            |      |       |
|--------|--------|----------------------------------------------------|---------------------|----------------------------|------|-------|
| P48960 | CD97   | CD97 molecule                                      | Plasma Membrane     | G-protein coupled receptor | NONE | -1.55 |
| P06681 | C2     | complement component 2                             | Extracellular Space | peptidase                  | NONE | -1.54 |
| Q9NYQ6 | CELSR1 | cadherin, EGF LAG seven-pass G-type receptor 1     | Plasma Membrane     | G-protein coupled receptor | NONE | -1.53 |
| P0CG06 | IGLC3  | immunoglobulin lambda constant 3 (Kern-Oz+ marker) | Extracellular Space | other                      | NONE | -1.53 |
| P06126 | CD1A   | CD1a molecule                                      | Plasma Membrane     | other                      |      | -1.52 |

|        |       |                                        |                        |        |                   |
|--------|-------|----------------------------------------|------------------------|--------|-------------------|
| O00560 | SDCBP | syndecan binding protein<br>(syntenin) | Plasma<br>Membra<br>ne | enzyme | NONE<br><br>-1.51 |
|--------|-------|----------------------------------------|------------------------|--------|-------------------|

**Table S4:**

See David\_FuncAnnotClustering\_BALF.csv for DAVID functional annotation clustering file.

**Table S5:**

**Transcription factors associated with binding sites on genes from differentially expressed proteins in BALF.** Transcription factors that have association with binding sites on genes from differentially expressed proteins in BALF as noted by DAVID [ref].

| Transcription factor with binding sites in the genes represented in BALF | Number of the differentially expressed proteins that have corresponding gene binding sites with transcription factor | % of dataset in DAVID database | p-value (Fisher exact) |
|--------------------------------------------------------------------------|----------------------------------------------------------------------------------------------------------------------|--------------------------------|------------------------|
| AREB6                                                                    | 166                                                                                                                  | 79.43                          | 0.009                  |
| SRF                                                                      | 148                                                                                                                  | 70.81                          | 0.000                  |
| AML1                                                                     | 147                                                                                                                  | 70.33                          | 0.089                  |
| P53                                                                      | 127                                                                                                                  | 60.77                          | 0.061                  |
| AP4                                                                      | 125                                                                                                                  | 59.81                          | 0.053                  |

|          |     |       |       |
|----------|-----|-------|-------|
| LMO2COM  | 122 | 58.37 | 0.004 |
| SREBP1   | 118 | 56.46 | 0.046 |
| PAX2     | 113 | 54.07 | 0.073 |
| USF      | 113 | 54.07 | 0.081 |
| PAX5     | 112 | 53.59 | 0.034 |
| GCNF     | 112 | 53.59 | 0.049 |
| STAT5A   | 111 | 53.11 | 0.074 |
| MRF2     | 110 | 52.63 | 0.001 |
| HTF      | 110 | 52.63 | 0.010 |
| TAXCREB  | 109 | 52.15 | 0.021 |
| CEBPB    | 109 | 52.15 | 0.041 |
| AHRARNT  | 105 | 50.24 | 0.031 |
| FOXO4    | 105 | 50.24 | 0.073 |
| RP58     | 104 | 49.76 | 0.032 |
| STAT3    | 101 | 48.33 | 0.004 |
| BACH1    | 101 | 48.33 | 0.028 |
| HNF4     | 100 | 47.85 | 0.010 |
| GFI1     | 97  | 46.41 | 0.002 |
| NFKB     | 97  | 46.41 | 0.071 |
| STAT1    | 96  | 45.93 | 0.000 |
| FREAC3   | 95  | 45.45 | 0.001 |
| CREBP1   | 95  | 45.45 | 0.033 |
| OCT      | 94  | 44.98 | 0.025 |
| CDPCR3HD | 92  | 44.02 | 0.019 |
| HAND1E47 | 92  | 44.02 | 0.052 |
| RSRFC4   | 91  | 43.54 | 0.091 |
| SOX9     | 90  | 43.06 | 0.028 |
| HFH1     | 90  | 43.06 | 0.044 |
| CMYB     | 89  | 42.58 | 0.014 |
| GATA     | 89  | 42.58 | 0.050 |
| HSF2     | 88  | 42.11 | 0.012 |
| IK3      | 88  | 42.11 | 0.058 |
| HOX13    | 88  | 42.11 | 0.098 |

|             |    |       |       |
|-------------|----|-------|-------|
| RORA1       | 87 | 41.63 | 0.087 |
| HLF         | 86 | 41.15 | 0.009 |
| FOXO1       | 85 | 40.67 | 0.026 |
| TGIF        | 84 | 40.19 | 0.060 |
| POU6F1      | 84 | 40.19 | 0.068 |
| E4BP4       | 84 | 40.19 | 0.100 |
| MIF1        | 83 | 39.71 | 0.074 |
| STAT        | 82 | 39.23 | 0.001 |
| CP2         | 82 | 39.23 | 0.020 |
| MSX1        | 81 | 38.76 | 0.098 |
| LYF1        | 80 | 38.28 | 0.032 |
| HNF3B       | 80 | 38.28 | 0.091 |
| NFKAPPAB    | 79 | 37.80 | 0.004 |
| NFE2        | 70 | 33.49 | 0.094 |
| FOXD3       | 69 | 33.01 | 0.061 |
| IK2         | 62 | 29.67 | 0.054 |
| TAL1BETAE47 | 61 | 29.19 | 0.041 |
| HSF1        | 61 | 29.19 | 0.087 |
| ZIC2        | 53 | 25.36 | 0.016 |
| GATA3       | 51 | 24.40 | 0.034 |
| MAX         | 37 | 17.70 | 0.089 |

**Table S6: Top functional networks of differentially expressed molecules in the BALF proteome.** The top biological functions associated with molecular pathways imputed with IPA that are significantly associated differentially expressed molecules measured in the BALF proteome. **Red** represents upregulated, and green represents downregulated proteins. **The** networks are collections of interconnected molecules assembled by a network algorithm. Each connection represents known relationships between the molecules, found in the Ingenuity Knowledge Base. **The score is the** degree of relevance of network eligible molecules to the BALF dataset. The



score takes into account the number of network eligible molecules in the network and its size, as well as the total number of network eligible molecules analyzed and the total number of molecules in the Ingenuity Knowledge Base that could potentially be included in networks. The network score is based on the hypergeometric distribution and is calculated with the right-tailed Fisher's Exact Test:  $\text{Score} = -\log(\text{Fisher's Exact test result})$ . Focus Molecules are the number of proteins identified in the BALF proteome that is found in the network.

| ID | Molecules in network                                                                                                                                                                                                                                                                                                                        | Score | Focus molecules | Top biological functions associated with the molecular network                           |
|----|---------------------------------------------------------------------------------------------------------------------------------------------------------------------------------------------------------------------------------------------------------------------------------------------------------------------------------------------|-------|-----------------|------------------------------------------------------------------------------------------|
| 1  | ACTG1, Actin, Akt, Alpha catenin, ANXA5, ARHGEF1, CD44, CFL1, Collagen type I, COTL1, F Actin, FLNA, HN1, Hsp27, ITGB4, Laminin, LGALS3, LUM, MARK2, MUC1, MYH11, MYO7A, PLEC, PRKCSH, PROS1, PTGDS, PVR, Rock, SDCBP, TGFBI, TMSB10/TMSB4X, TXNRD1, USP6NL, VIM, WASF2                                                                     | 51    | 27              | Cellular Movement, Inflammatory Response, Cardiovascular System Development and Function |
| 2  | AKR1C3, ANG, APCS, C3, C1q, C1QC, C4BP, CD1A, CHI3L1, Complement component 1, ENO1, EPX, ERK1/2, ETS, Fcer1, FETUB, FHOD1, Gm-csf, Ige, LAMA3, LRP1, Mac1, MARCO, PIK3C2B, PLA2, PLA2G1B, PPIA, PPIB, PRDX6, Rsk, S100A6, Sos, STC1, T3-TR-RXR, TH2 Cytokine                                                                                | 36    | 21              | Cell Death and Survival, Drug Metabolism, Small Molecule Biochemistry                    |
| 3  | APC, BOD1L1, C10orf116, C14orf80, C5orf51, CDC37, CEP128, CUL2, DDIT3, ELAVL1, GSK3B, GSTP1, KIAA0101, MYH15, NCKAP5L, PABPC4L, PCNA, RBM27, RNF214, RPS6KA6, RSBN1, SCGB1D2, SLC38A10, SND1, TRIM28, UBC, VAV2, ZNF256, ZNF667, ZRANB3                                                                                                     | 27    | 16              | Cell Morphology, Cellular Assembly and Organization, Cellular Development                |
| 4  | A2M, APOA1, APOB, APOC3, B3GNT9, chymotrypsin, Cytokeratin, elastase, FGA, FGB, FGG, Fibrin, Fibrinogen, GPIIB-IIIa, Growth hormone, HDL, HDL-cholesterol, HP, HPR, Kallikrein, KRT1, KRT9, KRT10, KRT6B, LDL-cholesterol, LRP, NFkB (complex), PCYOX1, PEBP1, Pro-inflammatory Cytokine, SAA, SFTPA1, SFTPD, Stat3-Stat3, VLDL-cholesterol | 27    | 18              | Developmental Disorder, Hematological Disease, Hereditary Disorder                       |

|    |                                                                                                                                                                                                                                                                                                                                                              |    |    |                                                                                                                   |
|----|--------------------------------------------------------------------------------------------------------------------------------------------------------------------------------------------------------------------------------------------------------------------------------------------------------------------------------------------------------------|----|----|-------------------------------------------------------------------------------------------------------------------|
| 5  | ANXA3, APITD1, C1GALT1C1, C1orf86, C9orf72, CYC1, EIF2B2, EIF2B3, EMG1, FANCB, FANCE, FANCF, FANCM, GALNT2, GALNT5, GGA1, GGA3, KRT79, LANCL1, MON2, MYOZ1, NAPSA, NLE1, PNKP, RAB6B, RABGAP1, RAPGEF6, RBM34, RMI2, SH3BGRL, SLC25A24, STRA13, TOP3A, UBC, ZNF292                                                                                           | 25 | 16 | Developmental Disorder, Hematological Disease, Hereditary Disorder                                                |
| 6  | Alp, BMP2K, C16orf88, CBR1, CD3, CDC45, Cg, CHD3, CNGA2, CUL4B, DBI, ENO2, Focal adhesion kinase, Hdac, Histone h3, Histone h4, Hsp70, HSPA6, ICAM1, IDH1, IKK (complex), LDL, NADPH oxidase, P38 MAPK, Pdgf (complex), PI3K (complex), Pkc(s), PREX1, RNA polymerase II, Sod, SRC (family), TALDO1, Vegf, VNN1, WNT9B                                       | 24 | 16 | Cancer, Gastrointestinal Disease, Cardiovascular Disease                                                          |
| 7  | AKAP6, BEND7, C11orf48, CCDC85A, CCNB1, CCND1, CDK5RAP3, CDKN1B, CMIP, DACH2, DDRGK1, DGCR14, DNAJC16, FOXO3, GSTM4, GSTM5, GSTO2, hemoglobin, LYAR, MYRIP, NANOG, PARPBP, PGAM4, PIK3R1, PRRC2C, RAB19, RSL24D1, SIX6, SLC34A2, STAT5A, TMEM55A, UBC, UBLCP1, UFC1, ZNF462                                                                                  | 20 | 14 | Cardiovascular System Development and Function, Cell Cycle, Skeletal and Muscular System Development and Function |
| 8  | ADCYAP1, alcohol dehydrogenase, ALDH16A1, ALDOC, APP, ASXL2, C19orf40, CALML3, CASP6, CCL5, CRTAC1, CWF19L2, FBXO34, GSTM3, HSP90AB1, HSPA2, HSPB7, IRAK3, KIFC3, MDH1, NUCB1, PDE1A, PSMB4, PSMD1, PTMS, RAB10, RNASE1, RUSC1, SCAVENGER receptor CLASS A, SDCCAG8, SH3RF2, TAGLN2, TRAF6, USP1, ZBTB20                                                     | 20 | 14 | Organismal Injury and Abnormalities, Cell Death and Survival, Nervous System Development and Function             |
| 9  | B4GALT1, BCR (complex), Collagen(s), CTSZ, DPP4, ERK, Fc gamma receptor, GATA3, GOT1, HLA-C, HSP, Ifn, IFN Beta, Ifn gamma, IgG1, Igg3, IgG, IGHG2, Igm, Ikb, IKBKB, IL1, IL12 (complex), IL12 (family), Immunoglobulin, Interferon alpha, LGALS3BP, MHC Class I (complex), MHC CLASS I (family), MHC Class II (complex), NKX3-2, PPBP, PRSS8, Tgf beta, Tlr | 17 | 12 | Cellular Movement, Hematological System Development and Function, Immune Cell Trafficking                         |
| 10 | 26sProteasome, ADCY, ARHGAP24, Calmodulin, CD97, CELSR1, chemokine, Ck2, EMR2, endocannabinoid, FBP1, FSH, Gpcr, GPR4, GPR68, GPRC5A, GRM8, Insulin, MAP9, Mapk, MID2, NAPA, OCRL, Pka, PLC, Rac, RAPSN, Ras, Ras homolog, Sfk, Shc, SYTL4, Trk Receptor, UBE2N, Ubiquitin                                                                                   | 17 | 12 | Cellular Assembly and Organization, Cellular Function and Maintenance, Molecular Transport                        |

|    |                                                                                                                                                                                                                                                                                                                |    |    |                                                                                               |
|----|----------------------------------------------------------------------------------------------------------------------------------------------------------------------------------------------------------------------------------------------------------------------------------------------------------------|----|----|-----------------------------------------------------------------------------------------------|
| 11 | ADH1B, AKAP9, ALDH3A1, Ap1, BLVRA, C2, C/ebp, calpain, caspase, Collagen type IV, Cyclin A, Cyclin E, DACH1, DLGAP4, estrogen receptor, FHL1, FN1, Hsp90, HTRA2, Integrin, Jnk, Lfa-1, MAP2K1/2, Mek, Metalloprotease, Mmp, MSLN, NFAT (complex), Nfat (family), NUMA1, p70 S6k, PDGF BB, PSMD14, TCR, trypsin | 16 | 13 | Cell Cycle, Visual System Development and Function, Hair and Skin Development and Function    |
| 12 | ADRBK2, CACNA1B, CCM2, CHRM3, CNR1, COL11A2, COL2A1, CREB3L3, D-glucose, endocannabinoid, FCHSD2, GABBR1, GBP5, GNB4, GNG5, GNG7, GNGT1, GPM6A, GPR68, ITGB1BP1, JAKMIP1, KRIT1, N-type Calcium Channel, PLA2G6, PLCB3, RGS6, SEPT4, SEPT7, SEPT8, SH3BGR, TRHR, TRPV4, UNC13C, VCPIP1, ZNF219                 | 13 | 10 | Connective Tissue Disorders, Developmental Disorder, Hereditary Disorder                      |
| 13 | ACP5, AKAP12, BCL3, CAMP, CPM, CSF1, CYP11A1, FANK1, FPR2, Hedgehog, HLX, HSD17B1, ITGB8, JUN, mannitol, MAP2K2, MAZ, MOGS, MTIF2, NOTCH4, PGC, PROM1, PTPRO, SERPINB2, SFTPB, SIRT6, SLC8A1, SMAD5, SOD2, STAB2, Stat3-Stat3, TEAD4, TMSB10/TMSB4X, USP36, VEGFA                                              | 8  | 7  | Cardiovascular System Development and Function, Embryonic Development, Organismal Development |
| 14 | ANO8, COQ9                                                                                                                                                                                                                                                                                                     | 2  | 1  | Hereditary Disorder, Metabolic Disease, Cancer                                                |
| 15 | Spag6, SPAG17                                                                                                                                                                                                                                                                                                  | 2  | 1  | Cellular Assembly and Organization, Cellular Compromise, Cellular Function and Maintenance    |
| 16 | ADCY10, SLC9C1                                                                                                                                                                                                                                                                                                 | 2  | 1  | Cellular Movement, Reproductive System Development and Function, Reproductive System Disease  |

Red=upregulated proteins

Green=downregulated protein

# Networks = collections of interconnected molecules assembled by a network algorithm. Each connection represents known relationships between the molecules, found in the Ingenuity Knowledge Base.

\* **Score**= The degree of relevance of Network Eligible molecules to the BALF dataset. The score takes into account the number of Network Eligible molecules in the network and its size, as well as the total number of Network Eligible molecules analyzed and the total number of molecules in the Ingenuity Knowledge Base that could potentially be included in networks. The network Score is based on the hypergeometric distribution and is calculated with the right-tailed Fisher's Exact Test.  $\text{Score} = -\log(\text{Fisher's Exact test result})$

^ Focus Molecules= The number of proteins identified in the BALF proteome that is found in the network

## TABLE S7

### Computational drug prediction CANDO

(score1= refers to the consensus score or number of times the compound shows up in the top 30 most similar drugs used to treat COPD

score2= the average of the ranks for 'score1'

probability= the binomial distribution derived probability of achieving 'score1' by chance based on the number of drugs associated with COPD, the total number of drugs in the library, and the number of most similar drugs to consider (in this case, 30).

name= generic name of the candidate drug)

CANDO= Computational Analysis of Novel Drug Opportunities

COPD= chronic obstructive pulmonary disease

| Rank | Score1<br>(consensus<br>score) | Score2 (average ranks score) | Probability | Name                  |
|------|--------------------------------|------------------------------|-------------|-----------------------|
| 1    | 12                             | 10.1                         | 1.11E-16    | clobetasol propionate |
| 2    | 12                             | 11.8                         | 1.11E-16    | clobetasol            |

|    |    |      |          |                          |
|----|----|------|----------|--------------------------|
| 3  | 12 | 12.7 | 1.11E-16 | rimexolone               |
| 4  | 11 | 12.5 | 4.88E-15 | deflazacort              |
| 5  | 10 | 7.2  | 2.07E-13 | loteprednol_etabonate    |
| 6  | 10 | 10.4 | 2.07E-13 | desoximetasone           |
| 7  | 10 | 13.1 | 2.07E-13 | loteprednol              |
| 8  | 10 | 13.4 | 2.07E-13 | meprednisone             |
| 9  | 10 | 14.4 | 2.07E-13 | amcinonide               |
| 10 | 9  | 13.2 | 7.66E-12 | flucolorolone acetone    |
| 11 | 9  | 15.1 | 7.66E-12 | fluorometholone          |
| 12 | 9  | 17.7 | 7.66E-12 | clobetasone              |
| 13 | 8  | 14.2 | 2.48E-10 | ulobetasol               |
| 14 | 8  | 16.1 | 2.48E-10 | procaterol               |
| 15 | 8  | 18.1 | 2.48E-10 | desonide                 |
| 16 | 7  | 11   | 6.95E-09 | prednicarbate            |
| 17 | 7  | 11.6 | 6.95E-09 | tezacaftor               |
| 18 | 7  | 16   | 6.95E-09 | cyproterone acetate      |
| 19 | 7  | 24.3 | 6.95E-09 | drometrizole trisiloxane |

|    |   |      |          |                         |
|----|---|------|----------|-------------------------|
| 20 | 6 | 14.2 | 1.67E-07 | nadolol                 |
| 21 | 6 | 14.5 | 1.67E-07 | hydrocortamate          |
| 22 | 6 | 19.7 | 1.67E-07 | hydrocortisone butyrate |
| 23 | 6 | 23.2 | 1.67E-07 | flurandrenolide         |
| 24 | 5 | 3    | 3.39E-06 | isoprenaline            |
| 25 | 5 | 4.6  | 3.39E-06 | epinephrine             |
| 26 | 5 | 5.6  | 3.39E-06 | orciprenaline           |
| 27 | 5 | 6.6  | 3.39E-06 | isoetharine             |
| 28 | 5 | 7.6  | 3.39E-06 | carbidopa               |
| 29 | 5 | 9.2  | 3.39E-06 | gemfibrozil             |
| 30 | 5 | 9.8  | 3.39E-06 | phenylephrine           |
| 31 | 5 | 9.8  | 3.39E-06 | methyldopa              |
| 32 | 5 | 10.8 | 3.39E-06 | carteolol               |
| 33 | 5 | 11.2 | 3.39E-06 | paramethasone acetate   |
| 34 | 5 | 11.8 | 3.39E-06 | clocortolone            |
| 35 | 5 | 12.2 | 3.39E-06 | arbutamine              |
| 36 | 5 | 12.4 | 3.39E-06 | pindolol                |

|    |   |      |          |                              |
|----|---|------|----------|------------------------------|
| 37 | 5 | 13.4 | 3.39E-06 | hydrocortisone acetate       |
| 38 | 5 | 13.8 | 3.39E-06 | levobunolol                  |
| 39 | 5 | 14.6 | 3.39E-06 | difluocortolone              |
| 40 | 5 | 17.6 | 3.39E-06 | propofol                     |
| 41 | 5 | 18.6 | 3.39E-06 | celiprolol                   |
| 42 | 5 | 18.8 | 3.39E-06 | levonordefrin                |
| 43 | 5 | 20.8 | 3.39E-06 | tapentadol                   |
| 44 | 5 | 20.8 | 3.39E-06 | segesterone acetate          |
| 45 | 4 | 9.2  | 5.72E-05 | betamethasone                |
| 46 | 4 | 9.2  | 5.72E-05 | methylprednisolone aceponate |
| 47 | 4 | 10.2 | 5.72E-05 | dexamethasone                |
| 48 | 4 | 11   | 5.72E-05 | naldemedine                  |
| 49 | 4 | 11.2 | 5.72E-05 | elvitegravir                 |
| 50 | 4 | 14   | 5.72E-05 | difluprednate                |
| 51 | 4 | 15.8 | 5.72E-05 | deferiprone                  |

|    |   |      |          |                         |
|----|---|------|----------|-------------------------|
| 52 | 4 | 17   | 5.72E-05 | methylprednisolone      |
| 53 | 4 | 17.5 | 5.72E-05 | prednisolone            |
| 54 | 4 | 18   | 5.72E-05 | tamsulosin              |
| 55 | 4 | 20.5 | 5.72E-05 | fluprednisolone         |
| 56 | 4 | 22.2 | 5.72E-05 | canrenoic acid          |
| 57 | 4 | 22.5 | 5.72E-05 | etidocaine              |
| 58 | 4 | 23   | 5.72E-05 | mephenesin              |
| 59 | 4 | 24.5 | 5.72E-05 | hydrocortisone valerate |
| 60 | 4 | 25.5 | 5.72E-05 | halcinonide             |
| 61 | 4 | 26   | 5.72E-05 | desvenlafaxine          |
| 62 | 3 | 5    | 7.80E-04 | fexofenadine            |
| 63 | 3 | 7    | 7.80E-04 | pioglitazone            |
| 64 | 3 | 7.7  | 7.80E-04 | laropiprant             |
| 65 | 3 | 8.3  | 7.80E-04 | terfenadine             |
| 66 | 3 | 8.7  | 7.80E-04 | cyclandelate            |



|    |   |      |          |                           |
|----|---|------|----------|---------------------------|
| 67 | 3 | 9.7  | 7.80E-04 | dobutamine                |
| 68 | 3 | 10   | 7.80E-04 | mometasone furoate        |
| 69 | 3 | 10.3 | 7.80E-04 | fentanyl                  |
| 70 | 3 | 11   | 7.80E-04 | amiodarone                |
| 71 | 3 | 11.3 | 7.80E-04 | siponimod                 |
| 72 | 3 | 12.3 | 7.80E-04 | homatropine methylbromide |
| 73 | 3 | 14   | 7.80E-04 | metaraminol               |
| 74 | 3 | 14   | 7.80E-04 | flunisolide               |
| 75 | 3 | 14.3 | 7.80E-04 | meradimate                |
| 76 | 3 | 14.7 | 7.80E-04 | fluocinonide              |
| 77 | 3 | 15   | 7.80E-04 | masoprocol                |
| 78 | 3 | 15   | 7.80E-04 | fluocinolone acetate      |
| 79 | 3 | 15.3 | 7.80E-04 | loperamide                |
| 80 | 3 | 16   | 7.80E-04 | hydrocortisone cypionate  |
| 81 | 3 | 16   | 7.80E-04 | piritramide               |

|    |   |      |          |                         |
|----|---|------|----------|-------------------------|
| 82 | 3 | 16.3 | 7.80E-04 | darifenacin             |
| 83 | 3 | 17   | 7.80E-04 | ebastine                |
| 84 | 3 | 18   | 7.80E-04 | guaifenesin             |
| 85 | 3 | 18.7 | 7.80E-04 | zolmitriptan            |
| 86 | 3 | 19   | 7.80E-04 | tropium                 |
| 87 | 3 | 19.3 | 7.80E-04 | darolutamide            |
| 88 | 3 | 19.7 | 7.80E-04 | olmesartan              |
| 89 | 3 | 20.3 | 7.80E-04 | megestrol acetate       |
| 90 | 3 | 20.7 | 7.80E-04 | levocabastine           |
| 91 | 3 | 23   | 7.80E-04 | benserazide             |
| 92 | 3 | 26   | 7.80E-04 | stiripentol             |
| 93 | 3 | 27   | 7.80E-04 | dipivefrin              |
| 94 | 3 | 29   | 7.80E-04 | norepinephrine          |
| 95 | 2 | 1    | 8.29E-03 | oxtriphylline           |
| 96 | 2 | 2    | 8.29E-03 | bromotheophylline       |
| 97 | 2 | 2    | 8.29E-03 | methscopolamine bromide |

|     |   |     |          |                                            |
|-----|---|-----|----------|--------------------------------------------|
| 98  | 2 | 2   | 8.29E-03 | butylscopolamine                           |
| 99  | 2 | 2.5 | 8.29E-03 | diethylamino_hydroxybenzoyl_hexyl_benzoate |
| 100 | 2 | 3   | 8.29E-03 | caffeine                                   |
| 101 | 2 | 3   | 8.29E-03 | methscopolamine                            |
| 102 | 2 | 4   | 8.29E-03 | xanthinol                                  |
| 103 | 2 | 4   | 8.29E-03 | dopexamine                                 |
| 104 | 2 | 4.5 | 8.29E-03 | difenoxin                                  |
| 105 | 2 | 4.5 | 8.29E-03 | scopolamine                                |
| 106 | 2 | 5   | 8.29E-03 | enprofylline                               |
| 107 | 2 | 5   | 8.29E-03 | oxyphenonium                               |
| 108 | 2 | 5.5 | 8.29E-03 | cortisone acetate                          |
| 109 | 2 | 5.5 | 8.29E-03 | labetalol                                  |
| 110 | 2 | 6   | 8.29E-03 | pentoxifylline                             |
| 111 | 2 | 6   | 8.29E-03 | oxybutynin                                 |
| 112 | 2 | 7   | 8.29E-03 | dyphylline                                 |

|     |   |      |          |                    |
|-----|---|------|----------|--------------------|
| 113 | 2 | 7    | 8.29E-03 | methylphenidate    |
| 114 | 2 | 8    | 8.29E-03 | temozolomide       |
| 115 | 2 | 8    | 8.29E-03 | cyclopentolate     |
| 116 | 2 | 8    | 8.29E-03 | dexmethylphenidate |
| 117 | 2 | 9    | 8.29E-03 | enoxacin           |
| 118 | 2 | 9    | 8.29E-03 | lemborexant        |
| 119 | 2 | 9    | 8.29E-03 | diflorasone        |
| 120 | 2 | 9    | 8.29E-03 | fluocortolone      |
| 121 | 2 | 9.5  | 8.29E-03 | apremilast         |
| 122 | 2 | 9.5  | 8.29E-03 | mepenzolate        |
| 123 | 2 | 9.5  | 8.29E-03 | mebeverine         |
| 124 | 2 | 9.5  | 8.29E-03 | etofamide          |
| 125 | 2 | 10   | 8.29E-03 | tipiracil          |
| 126 | 2 | 10   | 8.29E-03 | flumethasone       |
| 127 | 2 | 10.5 | 8.29E-03 | diphenoxylate      |
| 128 | 2 | 10.5 | 8.29E-03 | ambenonium         |

|     |   |      |          |                      |
|-----|---|------|----------|----------------------|
| 129 | 2 | 12   | 8.29E-03 | dexrazoxane          |
| 130 | 2 | 12   | 8.29E-03 | rosiglitazone        |
| 131 | 2 | 12.5 | 8.29E-03 | halofantrine         |
| 132 | 2 | 13   | 8.29E-03 | daunorubicin         |
| 133 | 2 | 13   | 8.29E-03 | dicloxacillin        |
| 134 | 2 | 13.5 | 8.29E-03 | permethrin           |
| 135 | 2 | 13.5 | 8.29E-03 | trimethaphan         |
| 136 | 2 | 14   | 8.29E-03 | tinidazole           |
| 137 | 2 | 14   | 8.29E-03 | penbutolol           |
| 138 | 2 | 14   | 8.29E-03 | oxyphencyclimine     |
| 139 | 2 | 15   | 8.29E-03 | acetazolamide        |
| 140 | 2 | 15   | 8.29E-03 | methylethergometrine |
| 141 | 2 | 15   | 8.29E-03 | cloxacillin          |
| 142 | 2 | 15   | 8.29E-03 | ecamsule             |
| 143 | 2 | 15   | 8.29E-03 | sonidegib            |
| 144 | 2 | 15.5 | 8.29E-03 | cefpirome            |
| 145 | 2 | 15.5 | 8.29E-03 | zofenopril           |

|     |   |      |          |                 |
|-----|---|------|----------|-----------------|
| 146 | 2 | 15.5 | 8.29E-03 | panobinostat    |
| 147 | 2 | 16   | 8.29E-03 | methimazole     |
| 148 | 2 | 16.5 | 8.29E-03 | troglitazone    |
| 149 | 2 | 16.5 | 8.29E-03 | flucloxacillin  |
| 150 | 2 | 17   | 8.29E-03 | levofloxacin    |
| 151 | 2 | 17   | 8.29E-03 | sumatriptan     |
| 152 | 2 | 17   | 8.29E-03 | pentoxifyverine |
| 153 | 2 | 17.5 | 8.29E-03 | elagolix        |
| 154 | 2 | 17.5 | 8.29E-03 | hexylcaine      |
| 155 | 2 | 18   | 8.29E-03 | ofloxacin       |
| 156 | 2 | 18   | 8.29E-03 | alclometasone   |
| 157 | 2 | 19   | 8.29E-03 | lomefloxacin    |
| 158 | 2 | 19   | 8.29E-03 | ioflupane i-123 |
| 159 | 2 | 19   | 8.29E-03 | losartan        |
| 160 | 2 | 19.5 | 8.29E-03 | bemotrizinol    |
| 161 | 2 | 20   | 8.29E-03 | epirubicin      |

|     |   |      |          |                    |
|-----|---|------|----------|--------------------|
| 162 | 2 | 20   | 8.29E-03 | benzethonium       |
| 163 | 2 | 20   | 8.29E-03 | benazepril         |
| 164 | 2 | 20   | 8.29E-03 | mepyramine         |
| 165 | 2 | 20.5 | 8.29E-03 | maraviroc          |
| 166 | 2 | 20.5 | 8.29E-03 | methysergide       |
| 167 | 2 | 20.5 | 8.29E-03 | dextropropoxyphene |
| 168 | 2 | 20.5 | 8.29E-03 | ritodrine          |
| 169 | 2 | 21   | 8.29E-03 | doxorubicin        |
| 170 | 2 | 21   | 8.29E-03 | cinchocaine        |
| 171 | 2 | 21   | 8.29E-03 | cefapirin          |
| 172 | 2 | 21.5 | 8.29E-03 | tegaserod          |
| 173 | 2 | 21.5 | 8.29E-03 | nomegestrol        |
| 174 | 2 | 22   | 8.29E-03 | dacarbazine        |
| 175 | 2 | 22.5 | 8.29E-03 | oxeladin           |
| 176 | 2 | 23   | 8.29E-03 | deutetrabenazine   |
| 177 | 2 | 23   | 8.29E-03 | tropicamide        |
| 178 | 2 | 23   | 8.29E-03 | triamcinolone      |

|     |   |      |          |                           |
|-----|---|------|----------|---------------------------|
| 179 | 2 | 23.5 | 8.29E-03 | lovastatin                |
| 180 | 2 | 24   | 8.29E-03 | methazolamide             |
| 181 | 2 | 25   | 8.29E-03 | pefloxacin                |
| 182 | 2 | 26   | 8.29E-03 | nalidixic acid            |
| 183 | 2 | 26   | 8.29E-03 | norgestimate              |
| 184 | 2 | 26.5 | 8.29E-03 | gestrinone                |
| 185 | 2 | 26.5 | 8.29E-03 | ergometrine               |
| 186 | 2 | 27   | 8.29E-03 | dorzolamide               |
| 187 | 2 | 27   | 8.29E-03 | ethylhexyl methoxycrylene |
| 188 | 2 | 28   | 8.29E-03 | lenalidomide              |
| 189 | 2 | 29   | 8.29E-03 | idarubicin                |



**Table S8****Predicted interactions of drugs treating respiratory diseases and central node proteins**

Representative drugs treating respiratory disease from selected categories showing their predicted interactions with the most central nodes entities of Figure 4

| <b>Drug</b>  | <b>Category</b>                           | <b>Undesired effect</b> | <b>Desired effect</b> |
|--------------|-------------------------------------------|-------------------------|-----------------------|
| azithromycin | antibiotic with anti-inflammatory effects | VIM, ICAM1              | FN1                   |
| BIBF 1120    | anti-fibrotic agent                       | FN1                     | --                    |
| fluticasone  | inhaled corticosteroid                    | ICAM1, CD44             | --                    |
| pirfenidone  | anti-fibrotic agent                       | FN1, ICAM1              | VIM                   |
| roflumilast  | phosphodiesterase inhibitor               | ICAM1, FN1              | VIM                   |
| salbutamol   | short acting beta agonist                 | FN1                     | --                    |
| salmeterol   | long-acting beta agonist                  | CD44                    | --                    |
| tiotropium   | long-acting anti-muscarinic agent         | FN1, ICAM1              | --                    |



Supplemental Figures

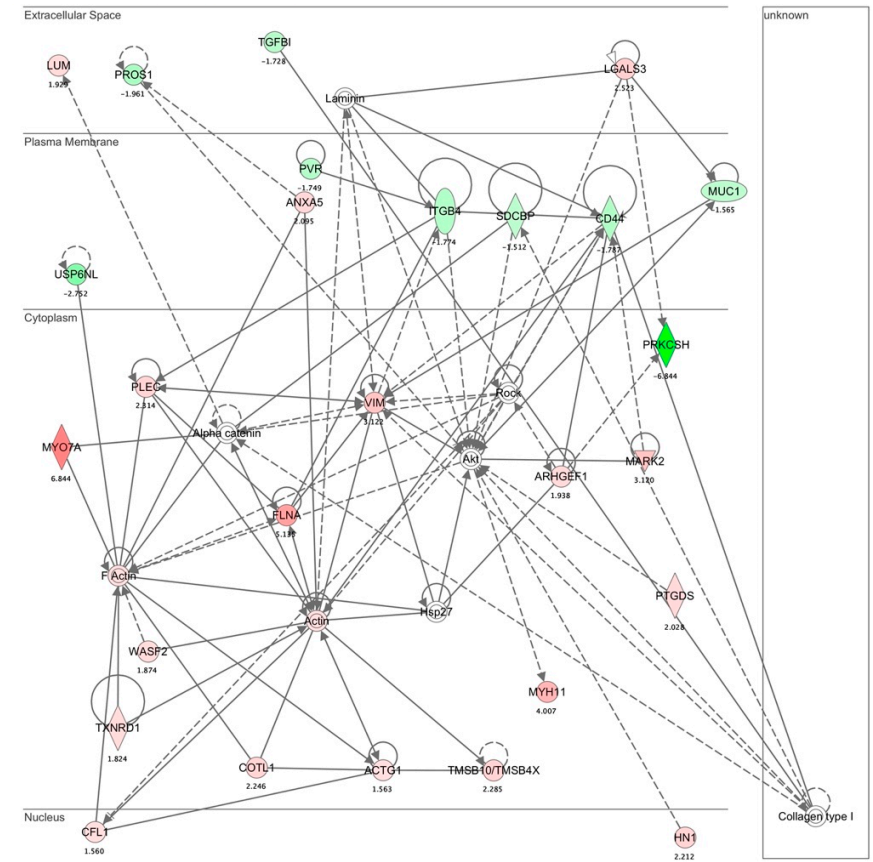

**Figure S1:**

**IPA Network 1: Cellular Movement, Inflammatory Response, Cardiovascular System Development and Function**

Functional annotation networks from IPA show relationships among the genes that in IPA's relational database are related to cellular movement, inflammatory response and cardiovascular system development and function.

Solid lines indicated a direct interaction between proteins, while dotted lines indicate an indirect association between two proteins.

Proteins upregulated in the BALF dataset are shaded in red and proteins downregulated in the BALF dataset are shaded in green. The darker shading to lighter shading corresponds to decreasing expression intensity.

IPA=Ingenuity Pathway Analysis, BALF= Bronchoalveolar Lavage Fluid

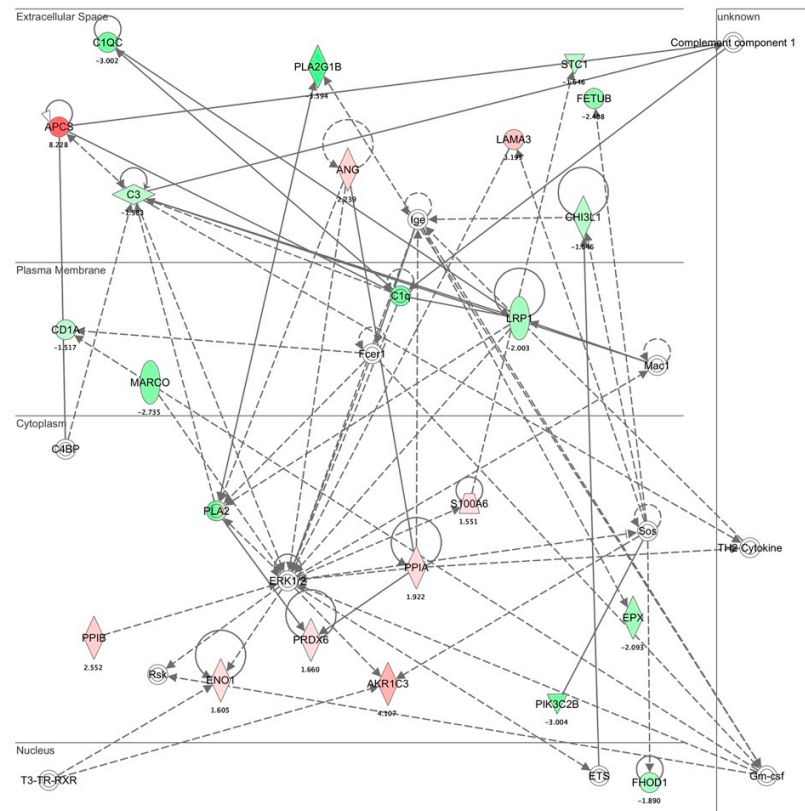

**Figure S2:**

**IPA network 2: cell death and survival, drug metabolism, small molecule biochemistry**

Functional annotation networks from IPA that show relationships among the genes that in IPA's relational database are related to cell death and survival, drug metabolism and small molecule biochemistry.

Solid lines indicated a direct interaction between proteins, while dotted lines indicate an indirect association between two proteins.

Proteins upregulated in the BALF dataset are shaded in red and proteins downregulated in the BALF dataset are shaded in green. The darker shading to lighter shading corresponds to decreasing expression intensity.

IPA=Ingenuity Pathway Analysis, BALF= Bronchoalveolar Lavage Fluid

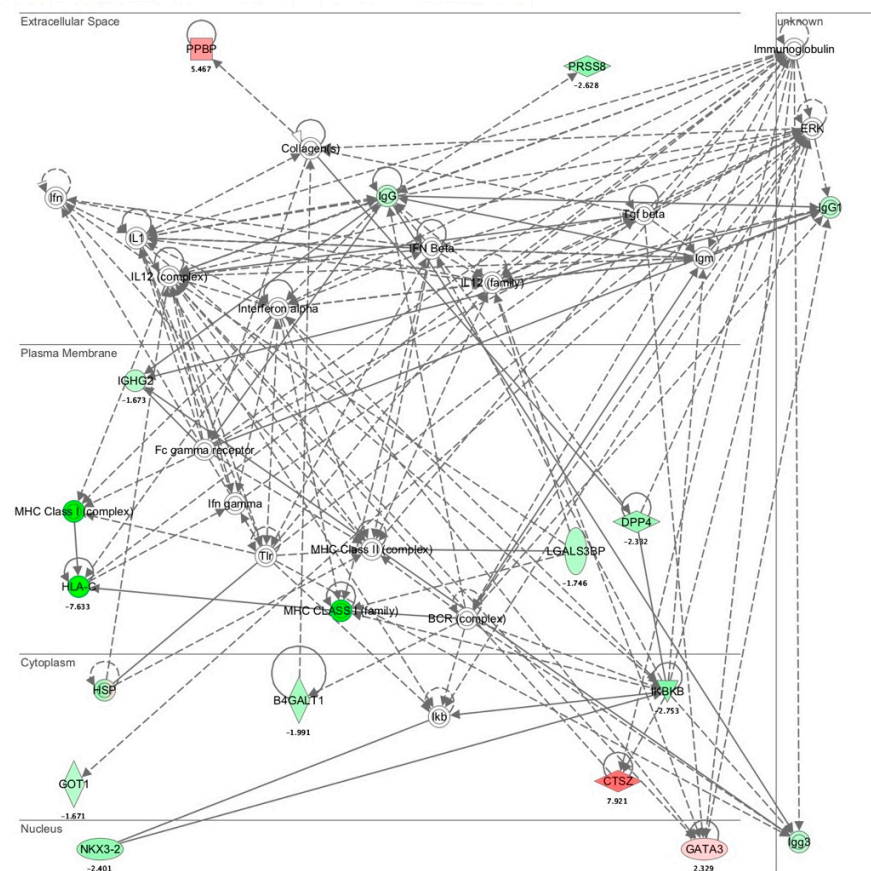

**Figure S3:**

**IPA network 9: cellular movement, hematological system development and function, immune cell trafficking**

Functional annotation networks from IPA that show relationships among the genes that in IPA's relational database are related to cellular movement, hematological system development and function, and immune cell trafficking.

Solid lines indicated a direct interaction between proteins, while dotted lines indicate an indirect association between two proteins.

Proteins upregulated in the BALF dataset are shaded in red and proteins downregulated in the BALF dataset are shaded in green. The darker shading to lighter shading corresponds to decreasing expression intensity.

IPA=Ingenuity Pathway Analysis, BALF= Bronchoalveolar Lavage Fluid



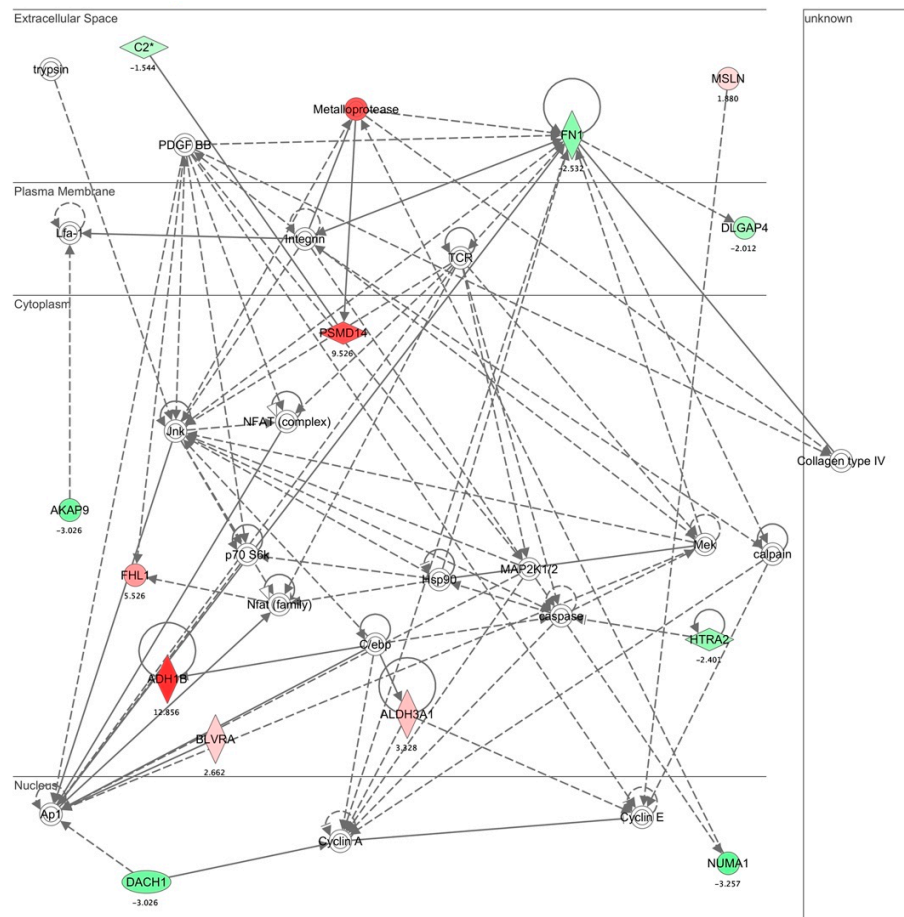

**Figure S4:**

**IPA network 11: cell cycle, visual system development and function, hair and skin development and function**

Functional annotation networks from IPA that show relationships among the genes that in IPA's relational database are related to cell cycle, visual system development and function, hair and skin development and function.

Solid lines indicated a direct interaction between proteins, while dotted lines indicate an indirect association between two proteins.

Proteins upregulated in the BALF dataset are shaded in red and proteins downregulated in the BALF dataset are shaded in green. The darker shading to lighter shading corresponds to decreasing expression intensity.

IPA=Ingenuity Pathway Analysis, BALF= Bronchoalveolar Lavage Fluid

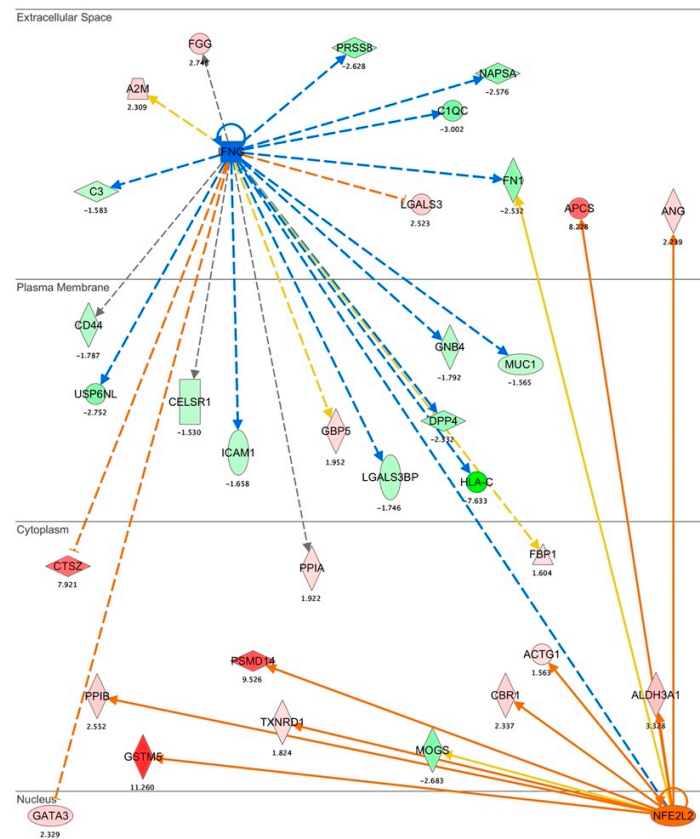

unknown

**Figure S5:**

**IPA network putative upstream regulators**

Putative upstream regulators of the proteins that were significantly differentially expressed between the cohorts were associated with a predicted downregulation and upregulation of interferon gamma and nuclear factor erythroid 2-related 2 (NRF2) respectively.

Solid lines indicated a direct interaction between proteins, while dotted lines indicate an indirect association between two proteins.

Proteins upregulated in the BALF dataset and are predicted are shaded in red and proteins downregulated in the BALF dataset are shaded in green. Interferon gamma is shaded in blue to denote a putative downregulation of the protein while NRF2 is shaded in orange to denote a putative upregulation of the protein based on the IPA relational database. The darker shading to lighter shading corresponds to decreasing expression intensity. The lines colored with orange shading correspond to interactions of the upstream regulator leading to increased protein synthesis of the downstream protein. The lines colored with blue shading correspond to interactions of the upstream regulator leading to decreased protein synthesis of the downstream protein. Lines colored with yellow shading indicate a downstream protein expression level that is discordant with the putative interaction from the upstream protein.

IPA=Ingenuity Pathway Analysis, BALF= Bronchoalveolar Lavage Fluid]

1. Berenson CS, Garlipp MA, Grove LJ, Maloney J, Sethi S. Impaired phagocytosis of nontypeable *Haemophilus influenzae* by human alveolar macrophages in chronic obstructive pulmonary disease. *J Infect Dis*. 2006;194(10):1375-1384.
2. Davis AP, Grondin CJ, Johnson RJ, et al. Comparative toxicogenomics database (CTD): update 2021. *Nucleic acids research*. 2021;49(D1):D1138-D1143.
3. Harju T, Mazur W, Merikallio H, Soini Y, Kinnula VL. Glutathione-S-transferases in lung and sputum specimens, effects of smoking and COPD severity. *Respiratory Research*. 2008;9:80.
4. Repapi E, Sayers I, Wain LV, et al. Genome-wide association study identifies five loci associated with lung function. *Nature Genetics*. 2010;42(1):36-44.
5. Soler Artigas M, Wain LV, Repapi E, et al. Effect of five genetic variants associated with lung function on the risk of chronic obstructive lung disease, and their joint effects on lung function. *American Journal of Respiratory & Critical Care Medicine*. 2011;184(7):786-795.
6. Mallia P, Footitt J, Sotero R, et al. Rhinovirus infection induces degradation of antimicrobial peptides and secondary bacterial infection in chronic obstructive pulmonary disease. *American Journal of Respiratory & Critical Care Medicine*. 2012;186(11):1117-1124.
7. Mantovani A. Pentraxin-3 in COPD: innocent bystander or amplifier? *Eur. Resp. J*. 2012;39(4):795-796.
8. Van Pottelberge GR, Bracke KR, Pauwels NS, Vermassen FE, Joos GF, Brusselle GG. COPD is associated with reduced pulmonary interstitial expression of pentraxin-3. *Eur. Resp. J*. 2012;39(4):830-838.
9. Di Stefano A, Caramori G, Gnemmi I, et al. Association of increased CCL5 and CXCL7 chemokine expression with neutrophil activation in severe stable COPD. *Thorax*. 2009;64(11):968-975.
10. Maltais F, Sullivan MJ, LeBlanc P, et al. Altered expression of myosin heavy chain in the vastus lateralis muscle in patients with COPD. *Eur. Resp. J*. 1999;13(4):850-854.
11. Nguyen T, Shrager J, Kaiser L, et al. Developmental myosin heavy chains in the adult human diaphragm: coexpression patterns and effect of COPD. *J. Appl. Physiol*. 2000;88(4):1446-1456.
12. Satta A, Migliori GB, Spanevello A, et al. Fibre types in skeletal muscles of chronic obstructive pulmonary disease patients related to respiratory function and exercise tolerance. *Eur. Resp. J*. 1997;10(12):2853-2860.
13. Verrills NM, Irwin JA, He XY, et al. Identification of novel diagnostic biomarkers for asthma and chronic obstructive pulmonary disease. *Am J Respir Crit Care Med*. 2011;183(12):1633-1643.
14. Engstrom G, Segelstorm N, Ekberg-Aronsson M, Nilsson PM, Lindgarde F, Lofdahl CG. Plasma markers of inflammation and incidence of hospitalisations for COPD: results from a population-based cohort study. *Thorax*. 2009;64(3):211-215.
15. van Dijk WD, Akkermans R, Heijdra Y, et al. The acute effect of cigarette smoking on the high-sensitivity CRP and fibrinogen

- biomarkers in chronic obstructive pulmonary disease patients. *Biomarkers in Medicine*. 2013;7(2):211-219.
16. Duvoix A, Dickens J, Haq I, et al. Blood fibrinogen as a biomarker of chronic obstructive pulmonary disease. *Thorax*. 2013;68(7):670-676.
  17. Mador MJ, Sethi S. Systemic inflammation in predicting COPD exacerbations. *JAMA*. 2013;309(22):2390-2391.
  18. Thomsen M, Ingebrigtsen TS, Marott JL, et al. Inflammatory biomarkers and exacerbations in chronic obstructive pulmonary disease. *JAMA*. 2013;309(22):2353-2361.
  19. Celli BR, Locantore N, Yates J, et al. Inflammatory biomarkers improve clinical prediction of mortality in chronic obstructive pulmonary disease. *Am J Respir Crit Care Med*. 2012;185(10):1065-1072.
  20. Thomsen M, Dahl M, Lange P, Vestbo J, Nordestgaard BG. Inflammatory biomarkers and comorbidities in chronic obstructive pulmonary disease. *Am J Respir Crit Care Med*. 2012;186(10):982-988.
  21. Gorowiec MR, Borthwick LA, Parker SM, Kirby JA, Saretzki GC, Fisher AJ. Free radical generation induces epithelial-to-mesenchymal transition in lung epithelium via a TGF-1-dependent mechanism. *Free Radical Biology & Medicine*. 2012;52(6):1024-1032.
  22. Milara J, Peiro T, Serrano A, Cortijo J. Epithelial to mesenchymal transition is increased in patients with COPD and induced by cigarette smoke. *Thorax*. 2013;68(5):410-420.
  23. Sohal SS, Reid D, Soltani A, et al. Reticular basement membrane fragmentation and potential epithelial mesenchymal transition is exaggerated in the airways of smokers with chronic obstructive pulmonary disease. *Respirology*. 2010;15(6):930-938.
  24. Wang Q, Wang Y, Zhang Y, Zhang Y, Xiao W. The role of uPAR in epithelial-mesenchymal transition in small airway epithelium of patients with chronic obstructive pulmonary disease. *Respiratory Research*. 2013;14:67.
  25. Zou W, Zou Y, Zhao Z, Li B, Ran P. Nicotine-induced epithelial-mesenchymal transition via Wnt/-catenin signaling in human airway epithelial cells. *American Journal of Physiology - Lung Cellular & Molecular Physiology*. 2013;304(4):L199-209.
  26. Mukaro VR, Bylund J, Hodge G, et al. Lectins offer new perspectives in the development of macrophage-targeted therapies for COPD/emphysema. *PLoS ONE [Electronic Resource]*. 2013;8(2):e56147.
  27. Pilette C, Colinet B, Kiss R, et al. Increased galectin-3 expression and intra-epithelial neutrophils in small airways in severe COPD. *Eur. Resp. J*. 2007;29(5):914-922.
  28. Brissenden JE, Cox DW. alpha 2-Macroglobulin in patients with obstructive lung disease, with and without alpha 1-antitrypsin deficiency. *Clinica Chimica Acta*. 1983;128(2-3):241-248.
  29. Kilroe-Smith TA, Dowdeswell RJ, Gaillard MC. Elastase binding capacity of alpha 2-macroglobulin in plasma of patients with asthma or chronic obstructive pulmonary disease, without alpha 1-protease inhibitor deficiency. *Clinica Chimica Acta*. 1989;185(1):81-90.

30. Mocchegiani E, Giacconi R, Costarelli L. Metalloproteases/anti-metalloproteases imbalance in chronic obstructive pulmonary disease: genetic factors and treatment implications. *Current Opinion in Pulmonary Medicine*. 2011;17 Suppl 1:S11-19.
31. Poller W, Barth J, Voss B. Detection of an alteration of the alpha 2-macroglobulin gene in a patient with chronic lung disease and serum alpha 2-macroglobulin deficiency. *Human Genetics*. 1989;83(1):93-96.
32. Ekeowa UI, Gooptu B, Belorgey D, et al. alpha1-Antitrypsin deficiency, chronic obstructive pulmonary disease and the serpinopathies. *Clinical Science*. 2009;116(12):837-850.
33. Lomas DA, Parker B. Francis lectureship. Antitrypsin deficiency, the serpinopathies, and chronic obstructive pulmonary disease. *Proceedings of the American Thoracic Society*. 2006;3(6):499-501.
34. Kristan SS, Marc MM, Kern I, et al. Airway angiogenesis in stable and exacerbated chronic obstructive pulmonary disease. *Scandinavian Journal of Immunology*. 2012;75(1):109-114.
35. Nicholas BL, Skipp P, Barton S, et al. Identification of lipocalin and apolipoprotein A1 as biomarkers of chronic obstructive pulmonary disease. *American Journal of Respiratory & Critical Care Medicine*. 2010;181(10):1049-1060.
36. Yoshida S, Minematsu N, Chubachi S, et al. Annexin V decreases PS-mediated macrophage efferocytosis and deteriorates elastase-induced pulmonary emphysema in mice. *American Journal of Physiology - Lung Cellular & Molecular Physiology*. 2012;303(10):L852-860.
37. Savarimuthu Francis SM, Larsen JE, Pavey SJ, et al. Genes and gene ontologies common to airflow obstruction and emphysema in the lungs of patients with COPD. *PLoS ONE [Electronic Resource]*. 2011;6(3):e17442.
38. Annoni R, Lancas T, Yukimatsu Tanigawa R, et al. Extracellular matrix composition in COPD. *Eur. Resp. J.* 2012;40(6):1362-1373.
39. Hu R, Ouyang Q, Dai A, Tan S, Xiao Z, Tang C. Heat shock protein 27 and cyclophilin A associate with the pathogenesis of COPD. *Respirology*. 2011;16(6):983-993.
40. Gosker HR, Langen RC, Bracke KR, et al. Extrapulmonary manifestations of chronic obstructive pulmonary disease in a mouse model of chronic cigarette smoke exposure. *American Journal of Respiratory Cell & Molecular Biology*. 2009;40(6):710-716.
41. Gosker HR, Zeegers MP, Wouters EF, Schols AM. Muscle fibre type shifting in the vastus lateralis of patients with COPD is associated with disease severity: a systematic review and meta-analysis. *Thorax*. 2007;62(11):944-949.
42. Jackson AS, Shrikrishna D, Kelly JL, et al. Vitamin D and skeletal muscle strength and endurance in COPD.[Erratum appears in Eur Respir J. 2013 Apr;41(4):998 Note: Kemp, Samuel V [added]]. *Eur. Resp. J.* 2013;41(2):309-316.
43. Levine S, Kaiser L, Leferovich J, Tikunov B. Cellular adaptations in the diaphragm in chronic obstructive pulmonary disease. *New England Journal of Medicine*. 1997;337(25):1799-1806.
44. Lewis MI, Fournier M, Storer TW, et al. Skeletal muscle adaptations to testosterone and resistance training in men with COPD. *J. Appl. Physiol.* 2007;103(4):1299-1310.

45. Ottenheijm CA, Heunks LM, Sieck GC, et al. Diaphragm dysfunction in chronic obstructive pulmonary disease. *American Journal of Respiratory & Critical Care Medicine*. 2005;172(2):200-205.
46. Basic VT, Tadele E, Elmabsout AA, et al. Exposure to cigarette smoke induces overexpression of von Hippel-Lindau tumor suppressor in mouse skeletal muscle. *American Journal of Physiology - Lung Cellular & Molecular Physiology*. 2012;303(6):L519-527.
47. Holownia A, Mroz RM, Kielek A, Chyczewska E, Braszko JJ. Nuclear HSP90 and HSP70 in COPD patients treated with formoterol or formoterol and corticosteroids. *European Journal of Medical Research*. 2009;14 Suppl 4:104-107.
48. Matokanovic M, Rumora L, Popovic-Grle S, Cepelak I, Culic O, Barisic K. Association of hsp70-2 (+1267A/G), hsp70-hom (+2437T/C), HMOX-1 (number of GT repeats) and TNF-alpha (+489G/A) polymorphisms with COPD in Croatian population. *Clinical Biochemistry*. 2012;45(10-11):770-774.
49. Xie J, Zhao J, Xiao C, Xu Y, Yang S, Ni W. Reduced heat shock protein 70 in airway smooth muscle in patients with chronic obstructive pulmonary disease. *Exp. Lung Res*. 2010;36(4):219-226.
50. Andresen E, Lange C, Strodthoff D, et al. S100A7/psoriasin expression in the human lung: unchanged in patients with COPD, but upregulated upon positive *S. aureus* detection. *BMC Pulmonary Medicine*. 2011;11:10.
51. Cockayne DA, Cheng DT, Waschki B, et al. Systemic biomarkers of neutrophilic inflammation, tissue injury and repair in COPD patients with differing levels of disease severity. *PLoS ONE [Electronic Resource]*. 2012;7(6):e38629.
52. Gray RD, MacGregor G, Noble D, et al. Sputum proteomics in inflammatory and suppurative respiratory diseases. *American Journal of Respiratory & Critical Care Medicine*. 2008;178(5):444-452.
53. Qiu W, Cho MH, Riley JH, et al. Genetics of sputum gene expression in chronic obstructive pulmonary disease. *PLoS ONE [Electronic Resource]*. 2011;6(9):e24395.
54. Guo X, Lin HM, Lin Z, et al. Surfactant protein gene A, B, and D marker alleles in chronic obstructive pulmonary disease of a Mexican population. *Eur. Resp. J*. 2001;18(3):482-490.
55. Ilumets H, Mazur W, Toljamo T, et al. Ageing and smoking contribute to plasma surfactant proteins and protease imbalance with correlations to airway obstruction. *BMC Pulmonary Medicine*. 2011;11:19.
56. Ishikawa N, Hattori N, Tanaka S, et al. Levels of surfactant proteins A and D and KL-6 are elevated in the induced sputum of chronic obstructive pulmonary disease patients: a sequential sputum analysis. *Respiration*. 2011;82(1):10-18.
57. Larsson P, Mirgorodskaya E, Samuelsson L, et al. Surfactant protein A and albumin in particles in exhaled air. *Respiratory Medicine*. 2012;106(2):197-204.
58. Ohlmeier S, Vuolanto M, Toljamo T, et al. Proteomics of human lung tissue identifies surfactant protein A as a marker of chronic obstructive pulmonary disease. *Journal of Proteome Research*. 2008;7(12):5125-5132.
59. van Diemen CC, Postma DS, Aulchenko YS, et al. Novel strategy to identify genetic risk factors for COPD severity: a genetic



- isolate. *Eur. Resp. J.* 2010;35(4):768-775.
60. Vlachaki EM, Koutsopoulos AV, Tzanakis N, et al. Altered surfactant protein-A expression in type II pneumocytes in COPD. *Chest.* 2010;137(1):37-45.
  61. Larocca NE, Moreno D, Garmendia JV, De Sanctis JB. Inhibitors of phosphoinositol 3 kinase and NFkB for the treatment of chronic obstructive pulmonary disease. *Recent Patents on Inflammation & Allergy Drug Discovery.* 2011;5(3):178-183.
  62. Marwick JA, Caramori G, Casolari P, et al. A role for phosphoinositol 3-kinase delta in the impairment of glucocorticoid responsiveness in patients with chronic obstructive pulmonary disease. *Journal of Allergy & Clinical Immunology.* 2010;125(5):1146-1153.
  63. To Y, Ito K, Kizawa Y, et al. Targeting phosphoinositide-3-kinase-delta with theophylline reverses corticosteroid insensitivity in chronic obstructive pulmonary disease. *American Journal of Respiratory & Critical Care Medicine.* 2010;182(7):897-904.
  64. Chung S, Sundar IK, Hwang JW, et al. NF-kB inducing kinase, NIK mediates cigarette smoke/TNF-induced histone acetylation and inflammation through differential activation of IKKs. *PLoS ONE [Electronic Resource].* 2011;6(8):e23488.
  65. Gagliardo R, Chanez P, Profita M, et al. Ikb kinase-driven nuclear factor-kB activation in patients with asthma and chronic obstructive pulmonary disease. *Journal of Allergy & Clinical Immunology.* 2011;128(3):635-645.e631-632.
  66. Yao H, Chung S, Hwang JW, et al. SIRT1 protects against emphysema via FOXO3-mediated reduction of premature senescence in mice. *Journal of Clinical Investigation.* 2012;122(6):2032-2045.
  67. Harvey CJ, Thimmulappa RK, Sethi S, et al. Targeting Nrf2 signaling improves bacterial clearance by alveolar macrophages in patients with COPD and in a mouse model. *Science Translational Medicine.* 2011;3(78):78ra32.
  68. Thomsen M, Nordestgaard BG, Kobzik L, Dahl M. Genetic variation in the scavenger receptor MARCO and its association with chronic obstructive pulmonary disease and lung infection in 10,604 individuals. *Respiration.* 2013;85(2):144-153.
  69. Baarsma HA, Spanjer AI, Haitsma G, et al. Activation of WNT/-catenin signaling in pulmonary fibroblasts by TGF-1 is increased in chronic obstructive pulmonary disease. *PLoS ONE [Electronic Resource].* 2011;6(9):e25450.
  70. Krimmer DI, Burgess JK, Wooi TK, Black JL, Oliver BG. Matrix proteins from smoke-exposed fibroblasts are pro-proliferative. *American Journal of Respiratory Cell & Molecular Biology.* 2012;46(1):34-39.
  71. Man SF, Xing L, Connett JE, et al. Circulating fibronectin to C-reactive protein ratio and mortality: a biomarker in COPD? *Eur. Resp. J.* 2008;32(6):1451-1457.
  72. Michalski J, Kanaji N, Liu X, et al. Attenuation of inhibitory prostaglandin E2 signaling in human lung fibroblasts is mediated by phosphodiesterase 4. *American Journal of Respiratory Cell & Molecular Biology.* 2012;47(6):729-737.
  73. Tomic R, Lassiter CC, Ritzenthaler JD, Rivera HN, Roman J. Anti-tissue remodeling effects of corticosteroids: fluticasone propionate inhibits fibronectin expression in fibroblasts. *Chest.* 2005;127(1):257-265.
  74. Bowler RP. Surfactant protein D as a biomarker for chronic obstructive pulmonary disease. *Copd: Journal of Chronic*

*Obstructive Pulmonary Disease*. 2012;9(6):651-653.

75. Foreman MG, Kong X, DeMeo DL, et al. Polymorphisms in surfactant protein-D are associated with chronic obstructive pulmonary disease. *American Journal of Respiratory Cell & Molecular Biology*. 2011;44(3):316-322.
76. Kim DK, Cho MH, Hersh CP, et al. Genome-wide association analysis of blood biomarkers in chronic obstructive pulmonary disease. *American Journal of Respiratory & Critical Care Medicine*. 2012;186(12):1238-1247.
77. Lomas DA, Silverman EK, Edwards LD, et al. Serum surfactant protein D is steroid sensitive and associated with exacerbations of COPD. *Eur. Resp. J*. 2009;34(1):95-102.
78. More JM, Voelker DR, Silveira LJ, Edwards MG, Chan ED, Bowler RP. Smoking reduces surfactant protein D and phospholipids in patients with and without chronic obstructive pulmonary disease. *BMC Pulmonary Medicine*. 2010;10:53.
79. Shakoory TA, Sin DD, Bokhari SN, Ghafoor F, Shakoory AR. SP-D polymorphisms and the risk of COPD. *Disease Markers*. 2012;33(2):91-100.
80. Kaparinos A, Argyropoulou E. Local renin-angiotensin II systems, angiotensin-converting enzyme and its homologue ACE2: their potential role in the pathogenesis of chronic obstructive pulmonary diseases, pulmonary hypertension and acute respiratory distress syndrome. *Current Medicinal Chemistry*. 18(23):3506-3515.
81. Somborac-Bacura A, Buljevic S, Rumora L, et al. Decreased soluble dipeptidyl peptidase IV activity as a potential serum biomarker for COPD. *Clinical Biochemistry*. 2012;45(15):1245-1250.
82. Dahlen I, Janson C, Bjornsson E, Stalenheim G, Peterson CG, Venge P. Changes in inflammatory markers following treatment of acute exacerbations of obstructive pulmonary disease. *Respiratory Medicine*. 2001;95(11):891-897.
83. Hodge S, Hodge G, Ahern J, Jersmann H, Holmes M, Reynolds PN. Smoking alters alveolar macrophage recognition and phagocytic ability: implications in chronic obstructive pulmonary disease. *American Journal of Respiratory Cell & Molecular Biology*. 2007;37(6):748-755.
84. Klagas I, Goulet S, Karakiulakis G, et al. Decreased hyaluronan in airway smooth muscle cells from patients with asthma and COPD. *Eur. Resp. J*. 2009;34(3):616-628.
85. Noguera A, Gomez C, Faner R, et al. An investigation of the resolution of inflammation (catabasis) in COPD. *Respiratory Research*. 2012;13:101.
86. Pons AR, Noguera A, Blanquer D, Saulea J, Pons J, Agusti AG. Phenotypic characterisation of alveolar macrophages and peripheral blood monocytes in COPD. *Eur. Resp. J*. 2005;25(4):647-652.
87. Hollander C, Sitkauskienė B, Sakalauskas R, Westin U, Janciauskienė SM. Serum and bronchial lavage fluid concentrations of IL-8, SLPI, sCD14 and sICAM-1 in patients with COPD and asthma. *Respiratory Medicine*. 2007;101(9):1947-1953.
88. Keicho N, Elliott WM, Hogg JC, Hayashi S. Adenovirus E1A gene dysregulates ICAM-1 expression in transformed pulmonary epithelial cells. *American Journal of Respiratory Cell & Molecular Biology*. 1997;16(1):23-30.

89. Kim S, Nadel JA. Fibrinogen binding to ICAM-1 promotes EGFR-dependent mucin production in human airway epithelial cells. *American Journal of Physiology - Lung Cellular & Molecular Physiology*. 2009;297(1):L174-183.
90. Lopez-Campos JL, Calero C, Arellano-Orden E, et al. Increased levels of soluble ICAM-1 in chronic obstructive pulmonary disease and resistant smokers are related to active smoking. *Biomarkers in Medicine*. 2012;6(6):805-811.
91. Riise GC, Larsson S, Lofdahl CG, Andersson BA. Circulating cell adhesion molecules in bronchial lavage and serum in COPD patients with chronic bronchitis. *Eur. Resp. J.* 1994;7(9):1673-1677.
92. Rusznak C, Mills PR, Devalia JL, Sapsford RJ, Davies RJ, Lozewicz S. Effect of cigarette smoke on the permeability and IL-1beta and sICAM-1 release from cultured human bronchial epithelial cells of never-smokers, smokers, and patients with chronic obstructive pulmonary disease. *American Journal of Respiratory Cell & Molecular Biology*. 2000;23(4):530-536.
93. Sajjan US, Jia Y, Newcomb DC, et al. H. influenzae potentiates airway epithelial cell responses to rhinovirus by increasing ICAM-1 and TLR3 expression. *FASEB Journal*. 2006;20(12):2121-2123.
94. Schneider D, Ganesan S, Comstock AT, et al. Increased cytokine response of rhinovirus-infected airway epithelial cells in chronic obstructive pulmonary disease. *American Journal of Respiratory & Critical Care Medicine*. 2010;182(3):332-340.
95. Yamaya M, Nishimura H, Hatachi Y, et al. Inhibitory effects of tiotropium on rhinovirus infection in human airway epithelial cells. *Eur. Resp. J.* 2012;40(1):122-132.
96. Zandvoort A, van der Geld YM, Jonker MR, et al. High ICAM-1 gene expression in pulmonary fibroblasts of COPD patients: a reflection of an enhanced immunological function. *Eur. Resp. J.* 2006;28(1):113-122.
97. Letuve S, Kozhich A, Arouche N, et al. YKL-40 is elevated in patients with chronic obstructive pulmonary disease and activates alveolar macrophages. *Journal of Immunology*. 2008;181(7):5167-5173.
98. Otsuka K, Matsumoto H, Niimi A, et al. Sputum YKL-40 levels and pathophysiology of asthma and chronic obstructive pulmonary disease. *Respiration*. 2012;83(6):507-519.
99. Sakazaki Y, Hoshino T, Takei S, et al. Overexpression of chitinase 3-like 1/YKL-40 in lung-specific IL-18-transgenic mice, smokers and COPD. *PLoS ONE [Electronic Resource]*. 2011;6(9):e24177.
100. Kosmas EN, Zorpidou D, Vassilareas V, Roussou T, Michaelides S. Decreased C4 complement component serum levels correlate with the degree of emphysema in patients with chronic bronchitis. *Chest*. 1997;112(2):341-347.
101. Miller RD, Kueppers F, Offord KP. Serum concentrations of C3 and C4 of the complement system in patients with chronic obstructive pulmonary disease. *Journal of Laboratory & Clinical Medicine*. 1980;95(2):266-271.
102. Stockley RA, Mistry M, Bradwell AR, Burnett D. A study of plasma proteins in the sol phase of sputum from patients with chronic bronchitis. *Thorax*. 1979;34(6):777-782.
103. Barta P, Van Pelt C, Men T, Dickey BF, Lotan R, Moghaddam SJ. Enhancement of lung tumorigenesis in a Gprc5a Knockout mouse by chronic extrinsic airway inflammation. *Molecular cancer*. 2012;11:4.

104. Fujimoto J, Kadara H, Garcia MM, et al. G-protein coupled receptor family C, group 5, member A (GPRC5A) expression is decreased in the adjacent field and normal bronchial epithelia of patients with chronic obstructive pulmonary disease and non-small-cell lung cancer. *Journal of Thoracic Oncology: Official Publication of the International Association for the Study of Lung Cancer*. 2012;7(12):1747-1754.
105. Ishikawa N, Mazur W, Toljamo T, et al. Ageing and long-term smoking affects KL-6 levels in the lung, induced sputum and plasma. *BMC Pulmonary Medicine*. 2011;11:22.
106. Leikauf GD, Borchers MT, Prows DR, Simpson LG. Mucin apoprotein expression in COPD. *Chest*. 2002;121(5 Suppl):166S-182S.
107. Freeman CM, Curtis JL, Chensue SW. CC chemokine receptor 5 and CXC chemokine receptor 6 expression by lung CD8+ cells correlates with chronic obstructive pulmonary disease severity. *American Journal of Pathology*. 2007;171(3):767-776.
108. Su YW, Xu YJ, Liu XS. Quantitative differentiation of dendritic cells in lung tissues of smokers with and without chronic obstructive pulmonary disease. *Chinese Medical Journal*. 2010;123(12):1500-1504.
109. Tsoumakidou M, Koutsopoulos AV, Tzanakis N, et al. Decreased small airway and alveolar CD83+ dendritic cells in COPD. *Chest*. 2009;136(3):726-733.
110. Verhoeven GT, Hegmans JP, Mulder PG, Bogaard JM, Hoogsteden HC, Prins JB. Effects of fluticasone propionate in COPD patients with bronchial hyperresponsiveness. *Thorax*. 2002;57(8):694-700.
111. Shapiro SD. Proteolysis in the lung. *The European respiratory journal. Supplement*. 2003;44(44 suppl):30s-32s.
112. Annoni R, Lancas T, Yukimatsu Tanigawa R, et al. Extracellular matrix composition in COPD. *Eur Respir J*. 2012;40(6):1362-1373.
113. Riise GC, Larsson S, Lofdahl CG, Andersson BA. Circulating cell adhesion molecules in bronchial lavage and serum in COPD patients with chronic bronchitis. *Eur Respir J*. 1994;7(9):1673-1677.
114. Yang M, Kohler M, Heyder T, et al. Proteomic profiling of lung immune cells reveals dysregulation of phagocytotic pathways in female-dominated molecular COPD phenotype. *Respir Res*. 2018;19(1):39.
115. Sethi S. Bacterial infection and the pathogenesis of COPD. *Chest*. 2000;117(5 Suppl 1):286S-291S.
116. Stockley RA. Neutrophils and the pathogenesis of COPD. *Chest*. 2002;121(5 Suppl):151S-155S.
117. Tu C, Mammen MJ, Li J, et al. Large-scale, ion-current-based proteomics investigation of bronchoalveolar lavage fluid in chronic obstructive pulmonary disease patients. *J Proteome Res*. 2014;13(2):627-639.
